# Supplementary material for: Photosensitizing CNTs by organotin(iv) compounds: generation of reactive oxygen species and degradation of amoxicillin
Source: Royal Society of Chemistry journal article supplement (doi:10.1039/d4dt02490g), 2024-01-01
Supplement: d4dt02490g1.pdf [file d4dt02490g1.pdf]

## Supplementary Information

### **Photosensitizing CNTs by organotin(IV) compounds: Generation of reactive oxygen species and degradation of Amoxicillin**

Sahil Thakur<sup>a</sup>, Jyoti Rohilla<sup>a</sup>, Sahil Sharma<sup>b</sup>, Raghubir Singh<sup>b</sup>, Raman Kamboj<sup>b</sup>, Varinder Kaur<sup>a\*</sup>

*<sup>a</sup>Department of Chemistry, Panjab University, Sector-14, Chandigarh-160014, India*

*<sup>b</sup>Department of Chemistry, DAV College, Sector 10, Chandigarh-160011, India*

\*Corresponding author: [var\\_ka04@yahoo.co.in](mailto:var_ka04@yahoo.co.in)(V.K.)

| <b>List of Figures and Tables</b> |                                                                                                                                                                                                               |             |
|-----------------------------------|---------------------------------------------------------------------------------------------------------------------------------------------------------------------------------------------------------------|-------------|
| <b>S1.1</b>                       | Synthesis of BSAL-EA                                                                                                                                                                                          | <b>S5</b>   |
| <b>S 1.1 -1.5</b>                 | Characterization of BSAL-DAP, Sn(IV) compound 1, Sn(IV) compound 2, 1@CNT, and 2@CNT                                                                                                                          | <b>S5-6</b> |
| <b>Figure S1</b>                  | FT-IR spectrum of BSAL-EA                                                                                                                                                                                     | <b>S7</b>   |
| <b>Figure S2</b>                  | FT-IR spectrum of organotin complex 1                                                                                                                                                                         | <b>S7</b>   |
| <b>Figure S3</b>                  | FT-IR spectrum of BSAL-DAP                                                                                                                                                                                    | <b>S8</b>   |
| <b>Figure S4</b>                  | FT-IR spectrum of organotin complex 2                                                                                                                                                                         | <b>S8</b>   |
| <b>Figure S5</b>                  | FT-IR spectrum comparison of BSAL-EA and [Me <sub>2</sub> Sn(SAL-EA)] <sub>2</sub>                                                                                                                            | <b>S9</b>   |
| <b>Figure S6</b>                  | FT-IR spectrum comparison of BSAL-DAP and [Me <sub>2</sub> Sn <sub>2</sub> (BSAL-DAP)(BSAL)]                                                                                                                  | <b>S9</b>   |
| <b>Figure S7</b>                  | <sup>1</sup> H-NMR spectrum (500 MHz, CDCl <sub>3</sub> ) of BSAL-EA                                                                                                                                          | <b>S10</b>  |
| <b>Figure S8</b>                  | <sup>1</sup> H-NMR spectrum (500 MHz, CDCl <sub>3</sub> ) of complex 1                                                                                                                                        | <b>S11</b>  |
| <b>Figure S9</b>                  | <sup>13</sup> C NMR spectrum (125 MHz, CDCl <sub>3</sub> ) of BSAL-EA                                                                                                                                         | <b>S12</b>  |
| <b>Figure S10</b>                 | <sup>13</sup> C NMR spectrum (125 MHz, CDCl <sub>3</sub> ) of complex 1                                                                                                                                       | <b>S13</b>  |
| <b>Figure S11</b>                 | <sup>119</sup> Sn NMR spectrum (186 MHz, CDCl <sub>3</sub> ) of complex 1                                                                                                                                     | <b>S14</b>  |
| <b>Figure S12</b>                 | ESI-MS spectrum of BSAL-EA                                                                                                                                                                                    | <b>S15</b>  |
| <b>Figure S13</b>                 | ESI-MS spectrum of complex 1                                                                                                                                                                                  | <b>S16</b>  |
| <b>Figure S14</b>                 | ( <sup>1</sup> H- <sup>1</sup> H) COSY NMR of Sn compound 1                                                                                                                                                   | <b>S17</b>  |
| <b>Figure S15</b>                 | <sup>1</sup> H-NMR spectrum (500 MHz, CDCl <sub>3</sub> ) of BSAL-DAP                                                                                                                                         | <b>S18</b>  |
| <b>Figure S16</b>                 | <sup>1</sup> H-NMR spectrum (500 MHz, CDCl <sub>3</sub> ) of complex 2                                                                                                                                        | <b>S19</b>  |
| <b>Figure S17</b>                 | <sup>13</sup> C NMR spectrum (125 MHz, CDCl <sub>3</sub> ) of BSAL-DAP                                                                                                                                        | <b>S19</b>  |
| <b>Figure S18</b>                 | <sup>13</sup> C NMR spectrum (125 MHz, CDCl <sub>3</sub> ) of complex 2                                                                                                                                       | <b>S20</b>  |
| <b>Figure S19</b>                 | <sup>119</sup> Sn NMR spectrum (186 MHz, CDCl <sub>3</sub> ) of complex 2                                                                                                                                     | <b>S21</b>  |
| <b>Figure S20</b>                 | ESI-MS spectrum of BSAL-DAP                                                                                                                                                                                   | <b>S22</b>  |
| <b>Figure S21</b>                 | ESI-MS spectrum of of complex 2                                                                                                                                                                               | <b>S23</b>  |
| <b>Figure S22</b>                 | ( <sup>1</sup> H- <sup>1</sup> H) COSY NMR of Sn compound 2                                                                                                                                                   | <b>S24</b>  |
| <b>Figure S23</b>                 | ORTEP representation of BSAL-EA showing intermolecular hydrogen bonding,                                                                                                                                      | <b>S24</b>  |
| <b>Figure S24</b>                 | ORTEP representation of BSAL-DAP showing intermolecular hydrogen bonding,                                                                                                                                     | <b>S25</b>  |
| <b>Figure S25</b>                 | <b>a)</b> topographical view of coordination in Compound 1, and <b>b)</b> topographical view of coordination in Compound 2 (for non-hydrogen atoms, the radius of hydrogen atoms was eliminated for clarity). | <b>S26</b>  |
| <b>Figure S26</b>                 | Elemental mapping of all elements of the 1@CNT (C, O, N, Br, and Sn)                                                                                                                                          | <b>S26</b>  |

|                   |                                                                                                                                                                                                                                                                                                              |               |
|-------------------|--------------------------------------------------------------------------------------------------------------------------------------------------------------------------------------------------------------------------------------------------------------------------------------------------------------|---------------|
|                   | at the surface.                                                                                                                                                                                                                                                                                              |               |
| <b>Figure S27</b> | Elemental mapping of all elements of the 2@CNT (C, O, N, Br, and Sn) at the surface.                                                                                                                                                                                                                         | <b>S27</b>    |
| <b>Figure S28</b> | Particle size distribution of 2@CNT                                                                                                                                                                                                                                                                          | <b>S27</b>    |
| <b>Figure S29</b> | DLS particle size distribution of compound 1                                                                                                                                                                                                                                                                 | <b>S28</b>    |
| <b>Figure S30</b> | DLS particle size distribution of compound 2                                                                                                                                                                                                                                                                 | <b>S28</b>    |
| <b>Figure S31</b> | DLS particle size distribution of 1@CNT                                                                                                                                                                                                                                                                      | <b>S29</b>    |
| <b>Figure S32</b> | DLS particle size distribution of 2@CNT                                                                                                                                                                                                                                                                      | <b>S29</b>    |
| <b>Figure S33</b> | EDAX distribution of 1@CNT                                                                                                                                                                                                                                                                                   | <b>S30</b>    |
| <b>Figure S34</b> | EDAX distribution of 2@CNT                                                                                                                                                                                                                                                                                   | <b>S31</b>    |
| <b>Figure S35</b> | PXRD pattern showing a comparison of data for <b>a)</b> CNT, <b>b)</b> 1@CNT, and <b>c)</b> 2@CNT.                                                                                                                                                                                                           | <b>S32</b>    |
| <b>Figure S36</b> | Simulated PXRD pattern comparison of BSAL-EA and organotin Complex 1                                                                                                                                                                                                                                         | <b>S33</b>    |
| <b>Figure S37</b> | Simulated PXRD pattern comparison of BSAL-DAP and organotin Complex 2                                                                                                                                                                                                                                        | <b>S33</b>    |
| <b>Figure S38</b> | Xps spectra of 1@CNT showing presence Sn 3d, Br 3d, C 1s, N 1s and O 1s elements.                                                                                                                                                                                                                            | <b>S34</b>    |
| <b>Figure S39</b> | Xps spectra of 2@CNT showing presence Sn 3d, Br 3d, C 1s, N 1s and O 1s elements.                                                                                                                                                                                                                            | <b>S34</b>    |
| <b>Figure S40</b> | UV absorption spectrum of 1@CNT and 2@CNT                                                                                                                                                                                                                                                                    | <b>S35</b>    |
| <b>Figure S41</b> | Tauc plot of synthesized Sn complex 1 and 2, showing bandgap $E_g$                                                                                                                                                                                                                                           | <b>S35</b>    |
| <b>Figure S42</b> | Absorption spectra of AMX photocatalytic degradation under dark                                                                                                                                                                                                                                              | <b>S36</b>    |
| <b>Figure S43</b> | Absorption spectra of AMX photocatalytic degradation using CNT, Complex 1, and Complex 2.                                                                                                                                                                                                                    | <b>S36</b>    |
| <b>Figure S44</b> | Effect of dosage amount of 1@CNT on AMX degradation                                                                                                                                                                                                                                                          | <b>S37</b>    |
| <b>Figure S45</b> | Absorption spectra of AMX photocatalytic degradation using TiO <sub>2</sub> as positive control.                                                                                                                                                                                                             | <b>S37</b>    |
| <b>Figure S46</b> | Absorption spectra of AMX photocatalytic degradation under visible light irradiation in presence of radical scavengers <b>a)</b> p-benzoquinone (PBQ) and <b>b)</b> tertbutyl alcohol (TBA)                                                                                                                  | <b>S38</b>    |
| <b>Figure S47</b> | <b>a)</b> DFT optimized structure of Amoxicillin using basis set 6-31g+(d,p), DFT calculated <b>b)</b> HOMO and <b>c)</b> LUMO molecular orbitals, Electrostatic potential (ESP) of Fukui function for <b>d)</b> nucleophilic attack (F <sup>+</sup> ) and <b>e)</b> electrophilic attack (F <sup>-</sup> ). | <b>S38</b>    |
| <b>Figure S48</b> | AMX degradation products by HPLC-MS                                                                                                                                                                                                                                                                          | <b>S39-41</b> |
| <b>Figure S49</b> | Proposed degradation pathway of AMX.                                                                                                                                                                                                                                                                         | <b>S42</b>    |

|                 |                                                                                                                      |               |
|-----------------|----------------------------------------------------------------------------------------------------------------------|---------------|
| <b>Table S1</b> | Crystallographic data and structural parameters for BSAL-EA, BSAL-DAP, Organotin complex 1, and Organotin complex 2. | <b>S43-44</b> |
| <b>Table S2</b> | Bonding parameters for for BSAL-EA, BSAL-DAP, Organotin complex 1, and Organotin complex 2.                          | <b>S45</b>    |
| <b>Table S3</b> | Charge distribution and Fukui index of AMX                                                                           | <b>S46</b>    |

### S1.1 Synthesis of BSAL-EA

In a single-neck round bottom flask, ethanamine (24.55 mmol, 1.50 g) was added to 5-bromosalicylaldehyde (24.55 mmol, 4.93 g) dissolved in 100 mL methanol. The reaction mixture was heated to reflux for 24 h and the contents were cooled to room temperature. The solvent was removed under a vacuum to afford a yellow solid. The product was filtered, washed with hexane and diethyl ether to remove the impurities, dried and stored under dry conditions. Yield: 90.80% (22.24 mmol, 5.43 g), Melting point: 90-92°C; FT-IR (KBr)  $\text{cm}^{-1}$ : 3300-2950 (br, OH, intramolecular hydrogen-bonded), 1633 (C=N), 1495(C-C), 1076, 1010 (C-O), 725 (C-Br).  $^1\text{H-NMR}$  (500 MHz,  $\text{CDCl}_3$ ):  $\delta$  (ppm) 1.63 (1H, s, Alk-OH), 3.69 (2H, t,  $^3J = 5.0$  Hz, H<sup>9</sup>), 3.85 (2H, t,  $^3J = 5.0$  Hz, H<sup>8</sup>), 6.78 (1H, d,  $^3J = 8.5$  Hz, H<sup>3</sup>), 7.30 (1H, dd, H<sup>2</sup>), 7.32 (1H, d, H<sup>6</sup>), 8.24 (1H, s, H<sup>7</sup>), 13.22 (1H, s, Ar-OH);  $^{13}\text{C NMR}$  (125 MHz,  $\text{CDCl}_3$ ):  $\delta$  (ppm) 61.6 (C<sup>9</sup>), 61.9 (C<sup>8</sup>), 110.1 (C<sup>1</sup>), 119.1 (C<sup>3</sup>), 120.0 (C<sup>5</sup>), 133.6 (C<sup>6</sup>), 135.1 (C<sup>2</sup>), 160.3 (C<sup>7</sup>), 165.7 (C<sup>4</sup>); ESI-MS (m/z): 244.36 (M+H)<sup>+</sup>, 246.36 (M+2+H)<sup>+</sup>. Anal. Calcd for C<sub>9</sub>H<sub>10</sub>NO<sub>2</sub>Br C, 44.29; H, 4.13; N, 5.74; Found: C, 44.28; H, 4.12; N, 5.76.

### S1.2 Characterization of Schiff base BSAL-DAP

Melting point: 92°C. Yield: 92.30% (34.62 mmol, 3.12 g) FT-IR (ATR)  $\text{cm}^{-1}$ : 3132 (broad, OH), 2900-2800 (CH), 1629 (C=N), 1478 (C-C), 1273 (C-N), 1162 (C-O), 620 (C-Br).  $^1\text{H-NMR}$  (500 MHz,  $\text{CDCl}_3$ ):  $\delta$  (ppm) 2.11 (1H, s, Alk-OH), 3.80 (4H, m, H<sup>8</sup>), 4.28 (1H, m, H<sup>9</sup>), 6.86-6.88 (2H, d,  $^3J = 10$  Hz, H<sup>3</sup>), 7.39 (4H, m, H<sup>2,6</sup>), 8.34 (2H, s, H<sup>7</sup>), 13.08 (2H, s, OH);  $^{13}\text{C-NMR}$  (125 MHz,  $\text{CDCl}_3$ ):  $\delta$  (ppm) 63.22 (C<sup>8</sup>), 70.28 (C<sup>9</sup>), 110.30 (C<sup>1</sup>), 119.09 (C<sup>3</sup>), 119.98 (C<sup>5</sup>), 133.69 (C<sup>6</sup>), 135.35 (C<sup>2</sup>), 160.09 (C<sup>7</sup>), 166.30 (C<sup>4</sup>); ESI-MS (m/z): 454.96 (M+H)<sup>+</sup>, 456.96 (M+2+H)<sup>+</sup>, 458.96 (M+4+H)<sup>+</sup>. Anal. Calcd for C<sub>17</sub>H<sub>16</sub>N<sub>2</sub>O<sub>3</sub>Br<sub>2</sub>; C, 44.76; H, 3.54; N, 6.14; Found: C, 44.32; H, 3.79; N, 6.32.

### S1.3 Characterization of Sn(IV) compound 1

Melting point: 202°C. Yield: 86.87% (3.5 mmol, 1.39 g). FT-IR (ATR)  $\text{cm}^{-1}$ : 2922, 2881, 2835 (CH), 1624 (C=N), 1452 (C-C), 1052 (C-O), 778 (C-Br), 688 (Sn-C), 596 (Sn-O), 523 (Sn-N).  $^1\text{H-NMR}$  (500 MHz,  $\text{CDCl}_3$ ):  $\delta$  (ppm) 0.65 (s, 12H, H<sup>10,11</sup>,  $^3J(^1\text{H}-^{117}\text{Sn}) = 74$  Hz,  $^3J(^1\text{H}-^{119}\text{Sn}) =$

77 Hz), 3.69 (4H, t,  $^3J=5$  Hz, H<sup>9</sup>), 4.08 (4H, t,  $^3J=5.0$  Hz, H<sup>8</sup>), 6.62-6.64 (2H, d,  $^3J=10$  Hz, H<sup>3</sup>), 7.22 (2H, d,  $^4J=2.5$  Hz, H<sup>6</sup>), 7.35-7.38 (2H, dd,  $^3J=8.5$  Hz,  $^4J=2$  Hz, H<sup>2</sup>), 8.33 (2H, s, H<sup>7</sup>); <sup>13</sup>C-NMR (125 MHz, CDCl<sub>3</sub>): δ (ppm) 0.15 (C<sup>10,11</sup>), 60.26 (C<sup>9</sup>), 62.58 (C<sup>8</sup>), 106.87 (C<sup>1</sup>), 118.49 (C<sup>3</sup>), 124.82 (C<sup>5</sup>), 136.05 (C<sup>6</sup>), 138.90 (C<sup>2</sup>), 168.30 (C<sup>7</sup>), 170.51 (C<sup>4</sup>); <sup>119</sup>Sn NMR (186 MHz, CDCl<sub>3</sub>): δ (ppm) -154.91; ESI-MS (m/z): 815.81 (M+H+CH<sub>3</sub>OH)<sup>+</sup>. Anal. Calcd for C<sub>22</sub>H<sub>28</sub>N<sub>2</sub>O<sub>4</sub>Br<sub>2</sub>Sn<sub>2</sub>; C, 33.80; H, 3.61; N, 3.58; Found: C, 34.34; H, 3.75; N, 3.83.

#### S1.4 Characterization of Sn(IV) compound 2

Melting point: 189 °C. Yield: 88.99% (1.95 mmol, 1.86 g). FT-IR (ATR) cm<sup>-1</sup>: 2915, 2839 (C-H), 1633 (C=N), 1455 (C-C), 1170 (C-O), 780 (C-Br), 687 (Sn-C), 578 (Sn-O), 536 (Sn-N). <sup>1</sup>H NMR (500 MHz, CDCl<sub>3</sub>): δ (ppm) 0.59 (s, 6H, H<sup>17</sup>), 0.70 (s, 6H, H<sup>18</sup>), 3.74 (m, 4H, H<sup>8</sup>), 4.20 (m, 1H, H<sup>9</sup>), 6.62-6.64 (d, 1H,  $^3J=10$  Hz, H<sup>11</sup>), 6.84-6.86 (d, 2H,  $^3J=10.0$  Hz, H<sup>3</sup>), 7.21 (d, 1H,  $^4J=2.5$  Hz, H<sup>12</sup>), 7.38 (m, 5H, H<sup>2,6,14</sup>), 8.33 (s, 2H, H<sup>7</sup>), 13.39 (s, 1H, H<sup>16</sup>). <sup>13</sup>C NMR (125 MHz, CDCl<sub>3</sub>): δ (ppm) 0.73 (C<sup>17</sup>), 1.93 (C<sup>18</sup>), 63.07 (C<sup>8</sup>), 65.81 (C<sup>8</sup>), 72.22 (C<sup>9</sup>), 107.73 (C<sup>13</sup>), 110.87 (C<sup>1</sup>), 119.10 (C<sup>3</sup>), 119.80 (C<sup>5</sup>), 120.85 (C<sup>11</sup>), 125.51 (C<sup>15</sup>), 134.27 (C<sup>6</sup>), 135.86 (C<sup>2</sup>), 136.69 (C<sup>12</sup>), 139.79 (C<sup>14</sup>), 161.04 (C<sup>7</sup>), 166.20 (C<sup>4</sup>), 171.46 (C<sup>10</sup>), 196.34 (C<sup>16</sup>). <sup>119</sup>Sn NMR (186 MHz, CDCl<sub>3</sub>): δ (ppm) -148.88, -465.04; ESI-MS (m/z): 950.94 (M+H)<sup>+</sup>, 952.93 (M+2+H)<sup>+</sup>, 954.93 (M+4+H)<sup>+</sup>. Anal. Calcd for C<sub>28</sub>H<sub>29</sub>N<sub>2</sub>O<sub>5</sub>Br<sub>3</sub>Sn<sub>2</sub>; C, 35.38; H, 3.07; N, 2.95; Found: C, 35.42; H, 3.12; N, 2.65.

#### S1.5 Characterization of 1@CNT and 2@CNT

1@CNT: Yield: 84% (168 mg). FT-IR cm<sup>-1</sup>: 2986- 2830 (C-H), 1620 (C=N), 1510 (C-C), 1049 (C-O), 769 (C-Br), 677 (Sn-C), 593 (Sn-O), 517 (Sn-N); 2@CNT: Yield: 77% (154 mg). FT-IR cm<sup>-1</sup>: 2952- 2839 (C-H), 1625 (C=N), 1520 (C-C), 1103 (C-O), 782 (C-Br), 688 (Sn-C), 634 (Sn-O), 537 (Sn-N).

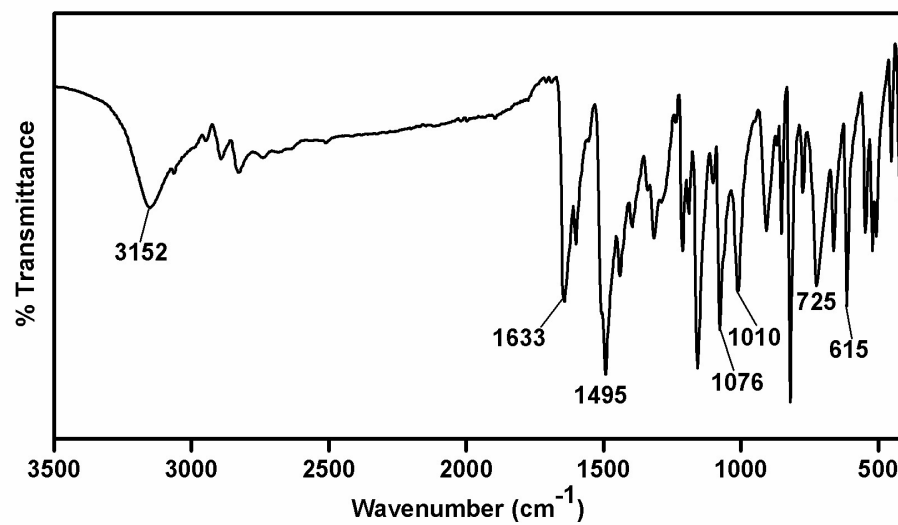

**Figure S1** FT-IR spectrum of BSAL-EA

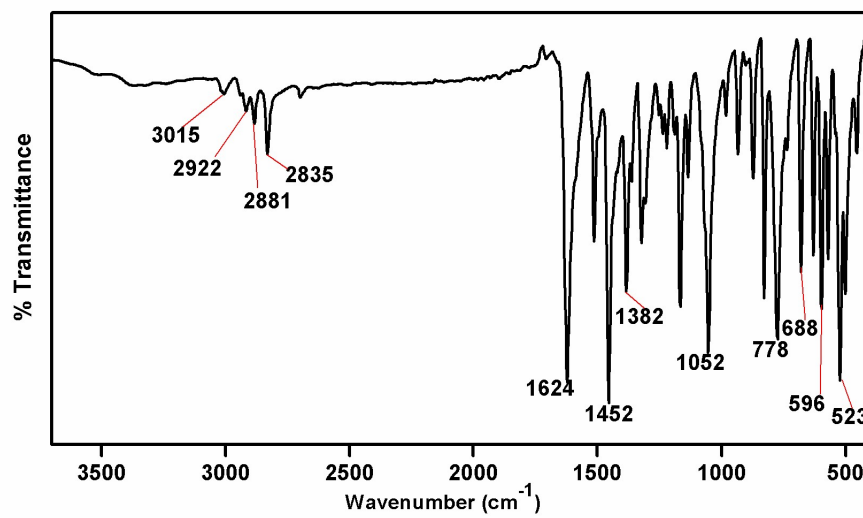

**Fig. S2** FT-IR spectrum of [Me<sub>2</sub>Sn(SAL-EA)]<sub>2</sub>

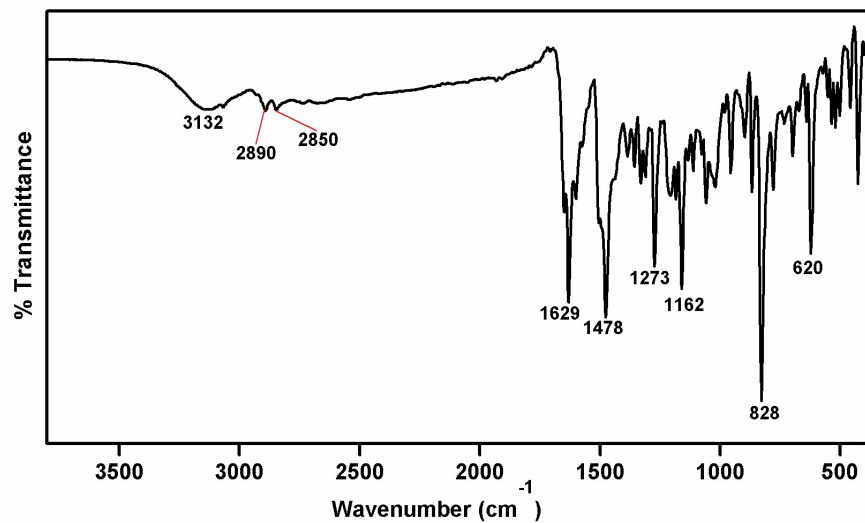

**Fig. S3** FT-IR spectrum of BSAL-DAP

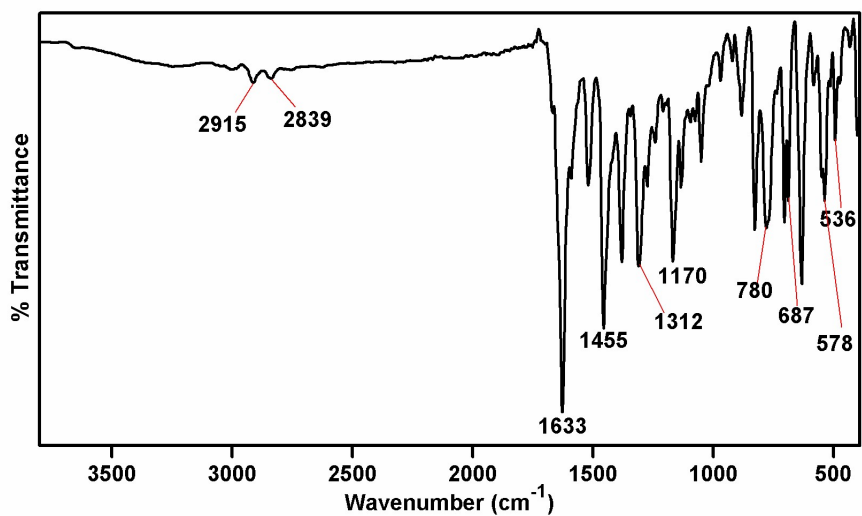

**Fig. S4** FT-IR spectrum of [Me<sub>2</sub>Sn<sub>2</sub>(BSAL-DAP)(BSAL)]



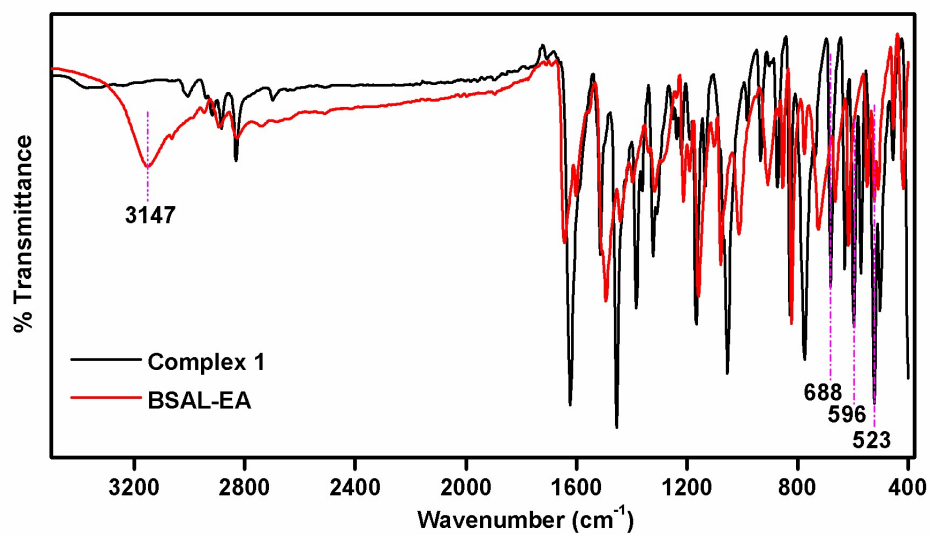

**Fig. S5** FT-IR spectrum comparison of BSAL-EA and [Me<sub>2</sub>Sn(SAL-EA)]<sub>2</sub>

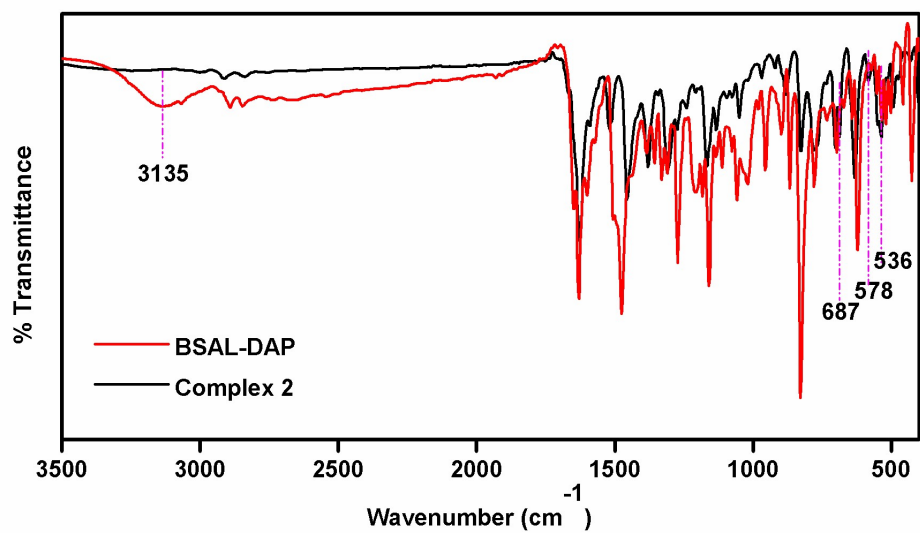

**Fig. S6** FT-IR spectrum comparison of BSAL-DAP and [Me<sub>2</sub>Sn<sub>2</sub>(BSAL-DAP)(BSAL)]

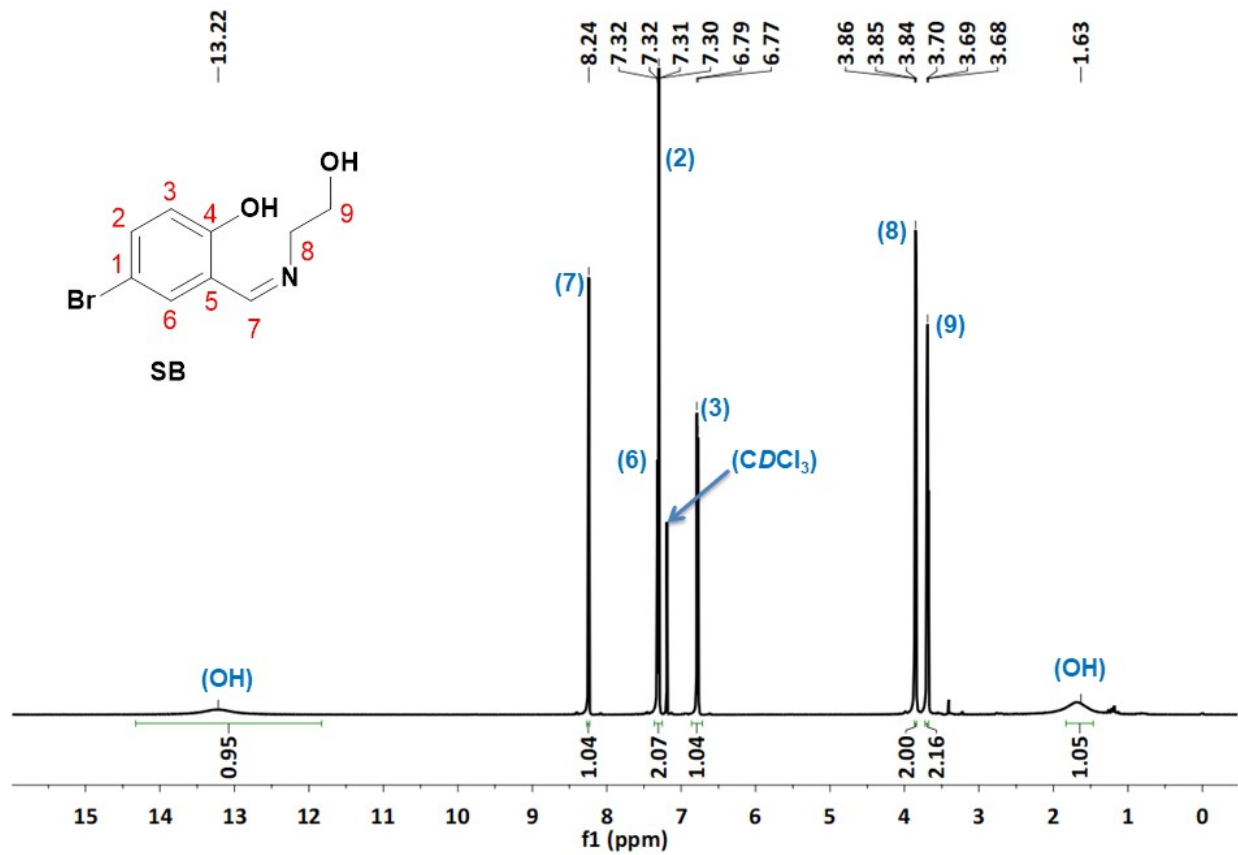

**Figure S7** <sup>1</sup>H-NMR spectrum (500 MHz, CDCl<sub>3</sub>) BSAL-EA.

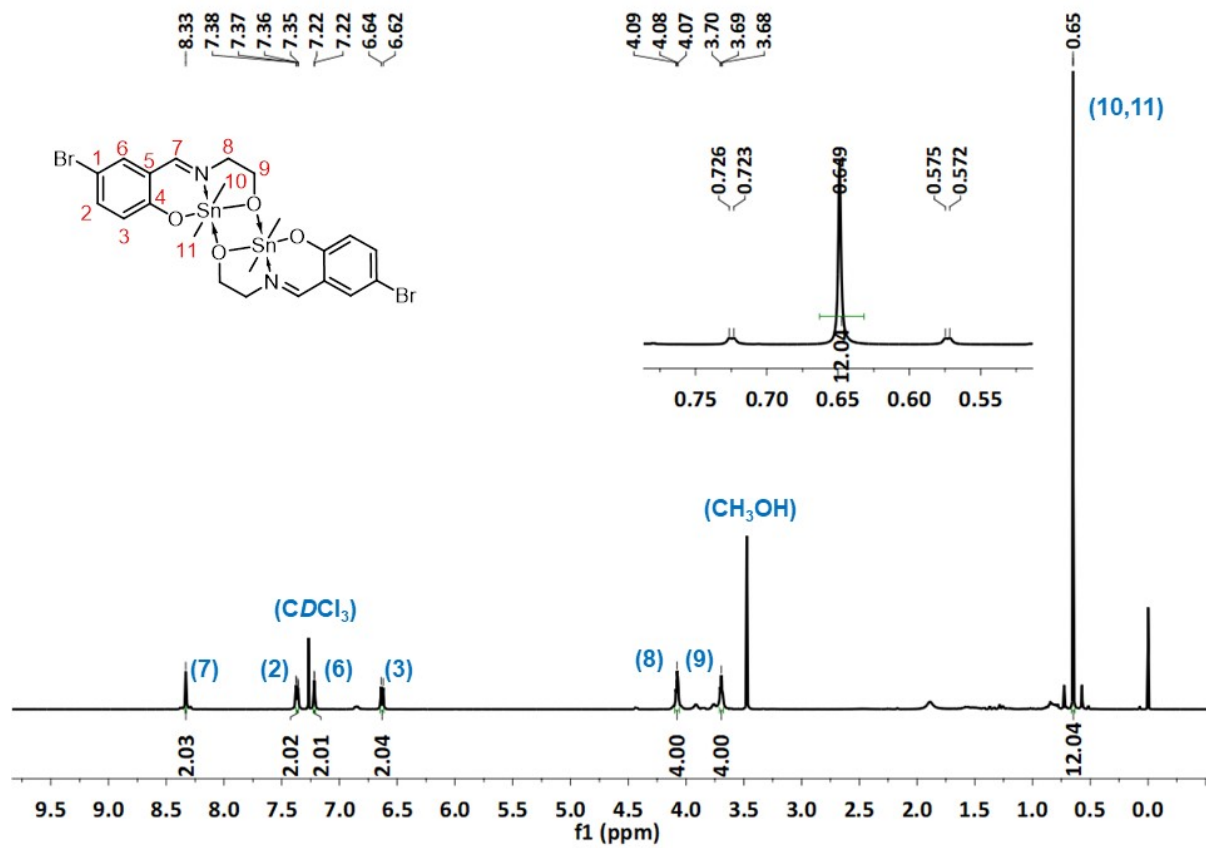

Fig. S8 <sup>1</sup>H-NMR spectrum (500 MHz, CDCl<sub>3</sub>) of [Me<sub>2</sub>Sn(SAL-EA)]<sub>2</sub>

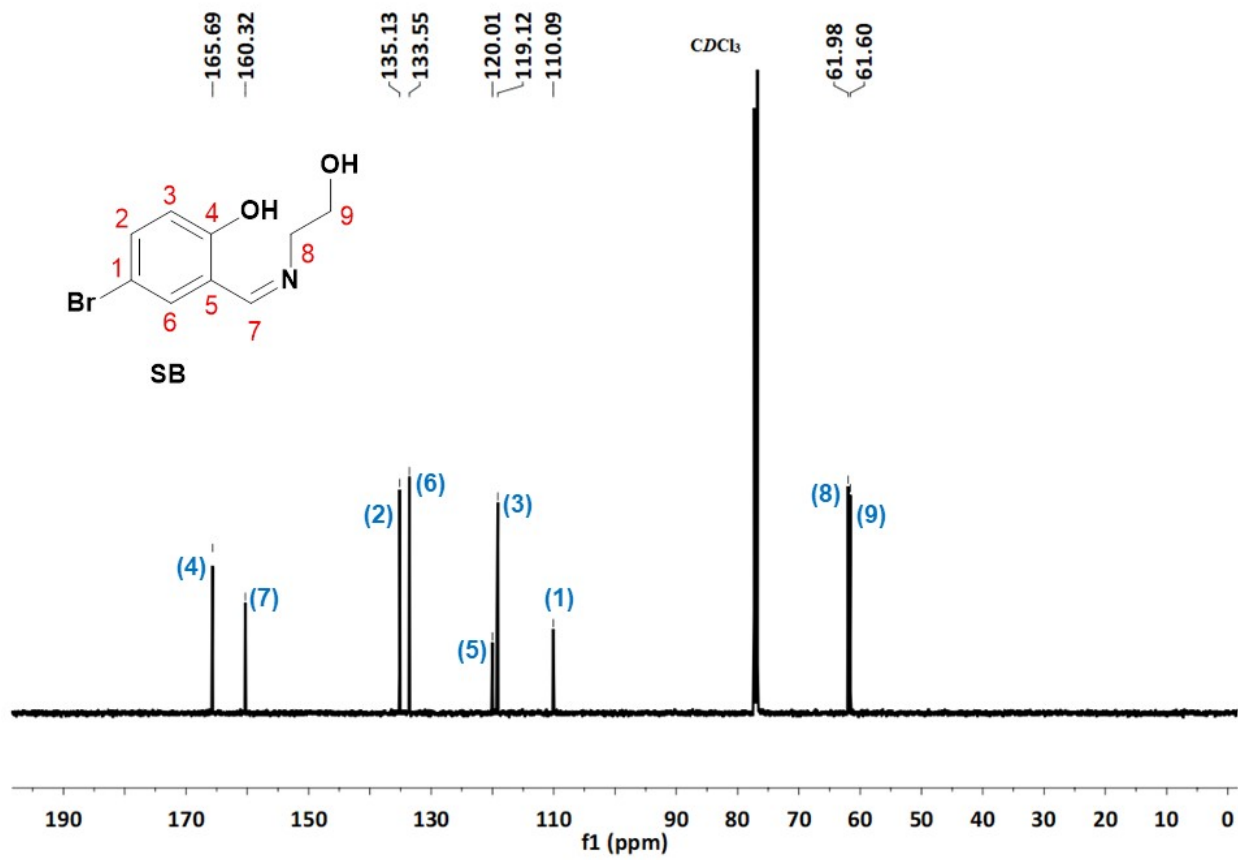

Figure S9  $^{13}\text{C}$ -NMR spectrum (125 MHz,  $\text{CDCl}_3$ ) BSAL-EA.

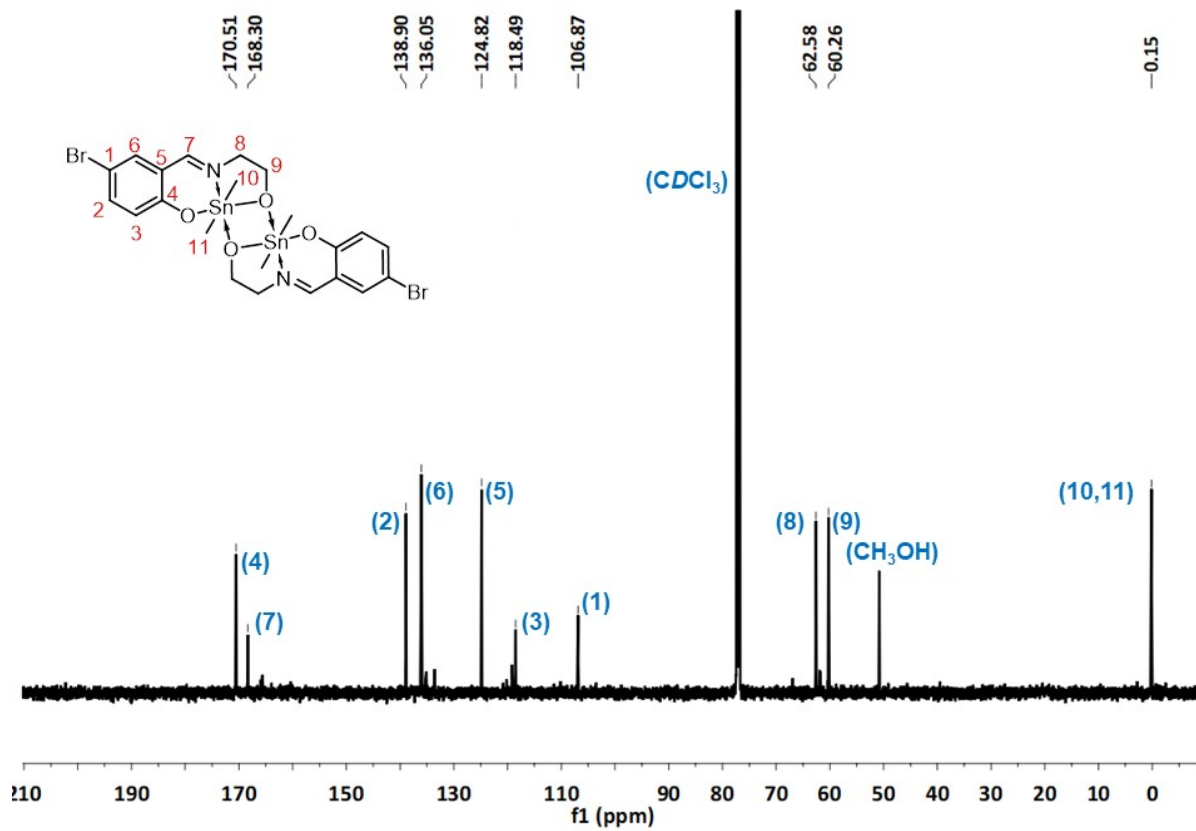

**Fig. S10**  $^{13}\text{C}$  NMR spectrum (125 MHz,  $\text{CDCl}_3$ ) of  $[\text{Me}_2\text{Sn}(\text{SAL-EA})]_2$

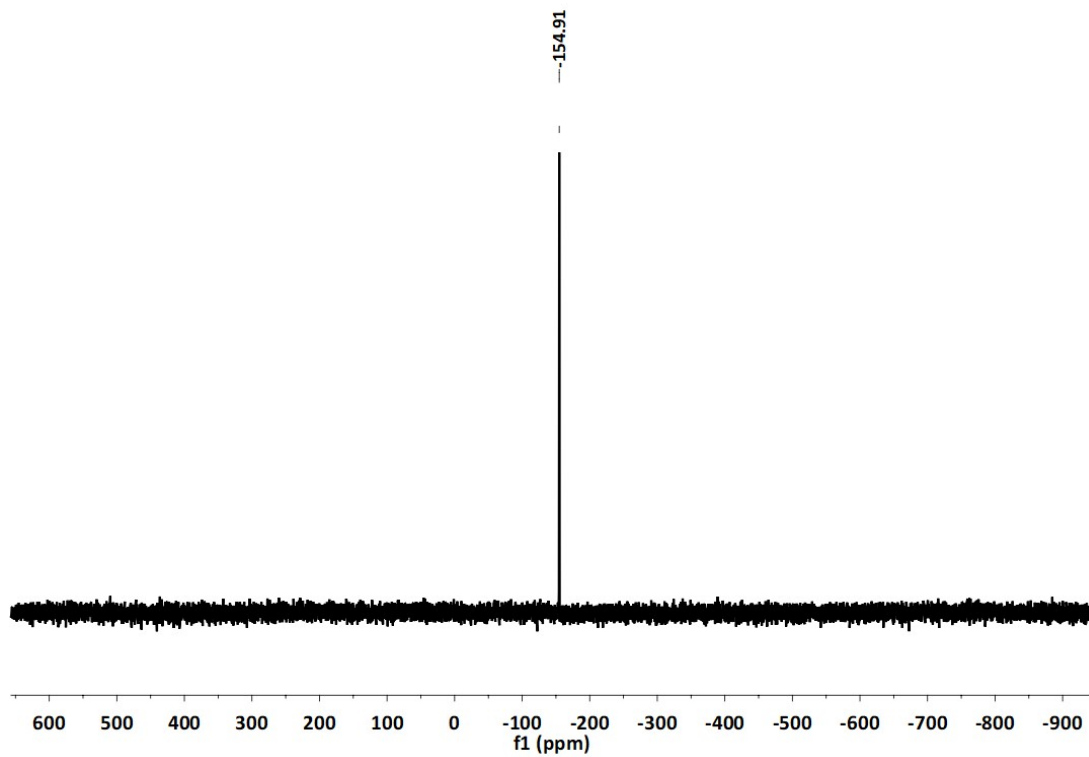

Fig. S11  $^{119}\text{Sn}$  NMR spectrum (186 MHz,  $\text{CDCl}_3$ ) of  $[\text{Me}_2\text{Sn}(\text{SAL-EA})]_2$

**WATERS,Q-TOF MICROMASS (ESI-MS)**

JYOTI SB 35 (0.533) Sm (SG, 2x3.00); Cm (16:47)

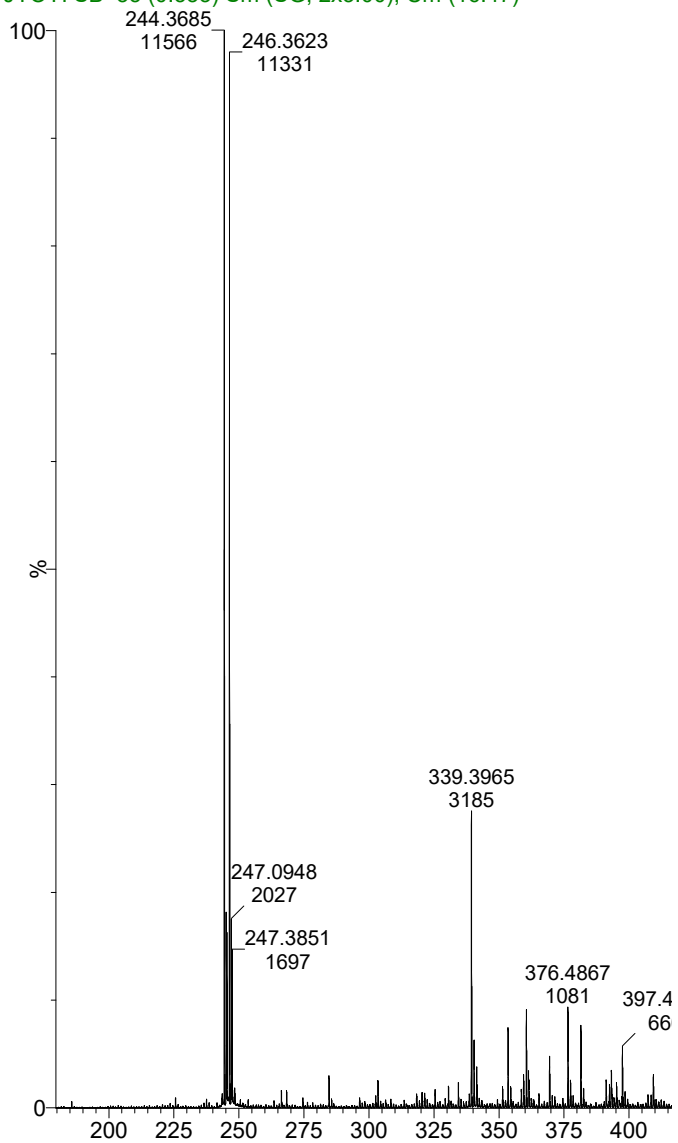

**Figure S12** ESI-MS spectrum of Schiff base BSAL-EA.

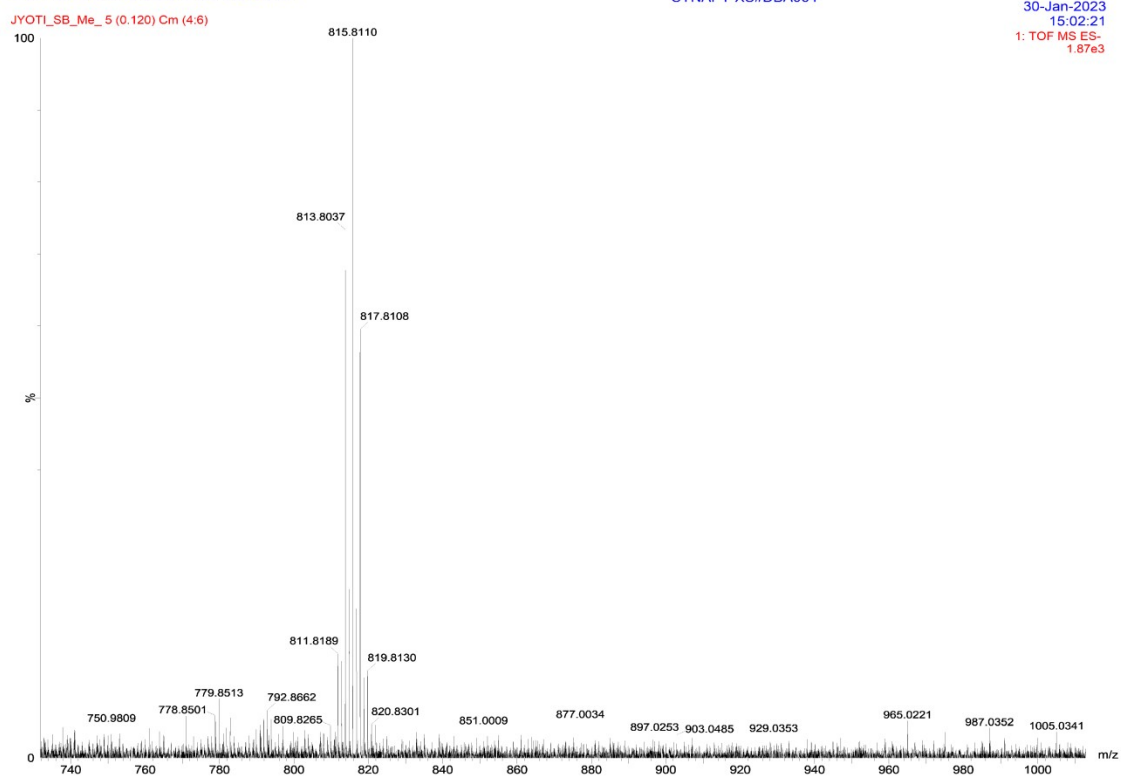

**Fig. S13** ESI-MS spectrum of  $[\text{Me}_2\text{Sn}(\text{SAL-EA})]_2$



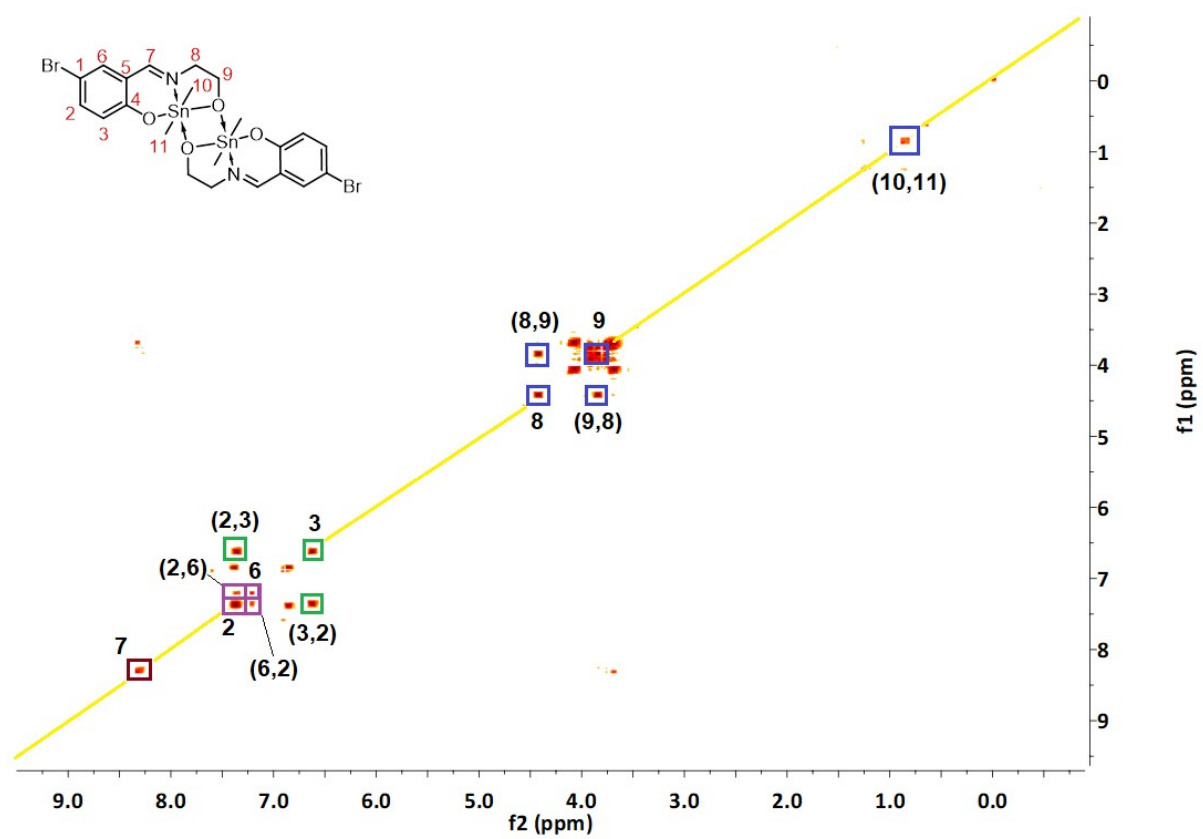

Fig. S14 (<sup>1</sup>H-<sup>1</sup>H) COSY NMR of Sn compound 1.

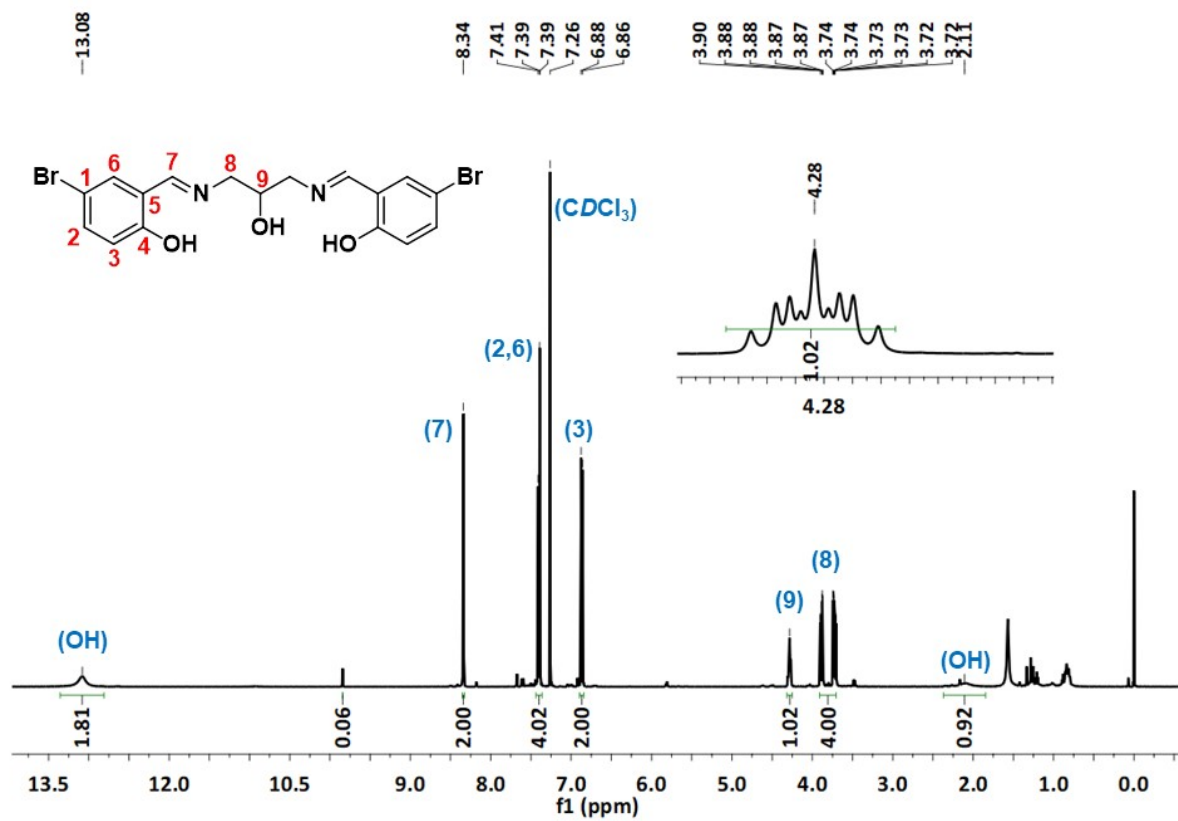

Fig. S15 <sup>1</sup>H-NMR spectrum (500 MHz, CDCl<sub>3</sub>) of BSAL-DAP

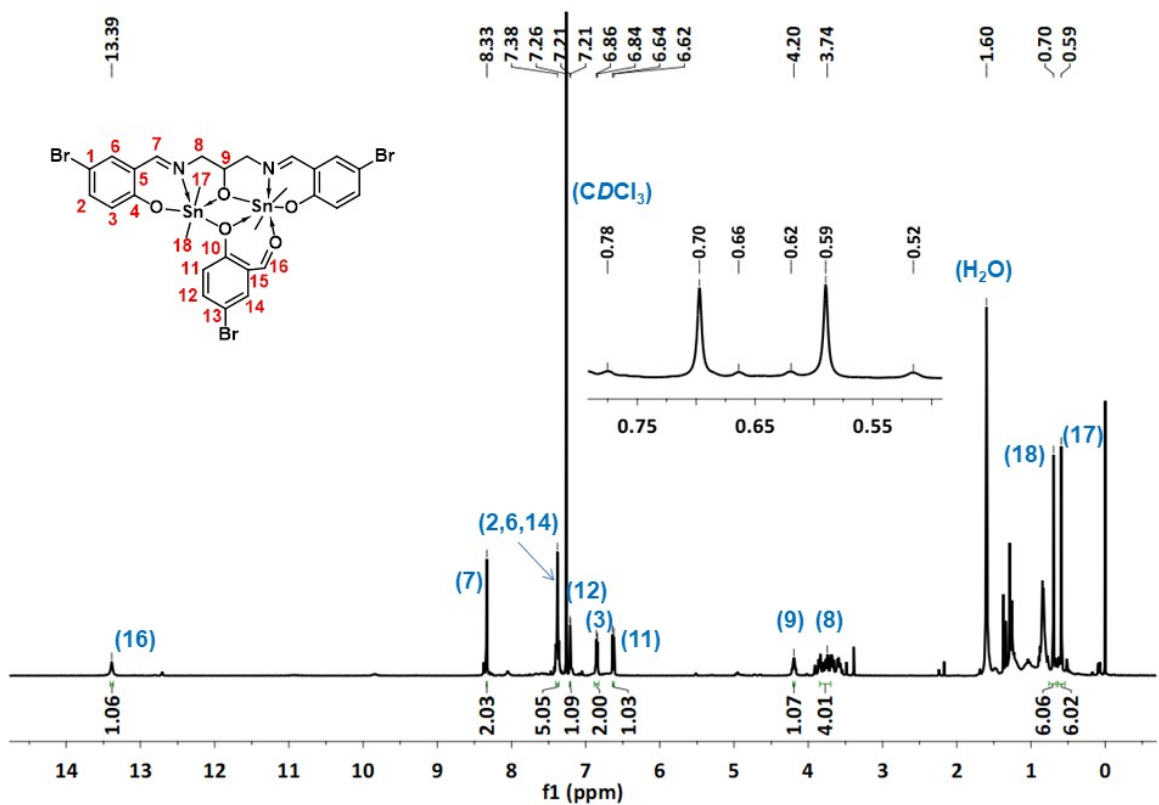

g. S16 <sup>1</sup>H-NMR spectrum (500 MHz, CDCl<sub>3</sub>) of [Me<sub>2</sub>Sn<sub>2</sub>(BSAL-DAP)(BSAL)]

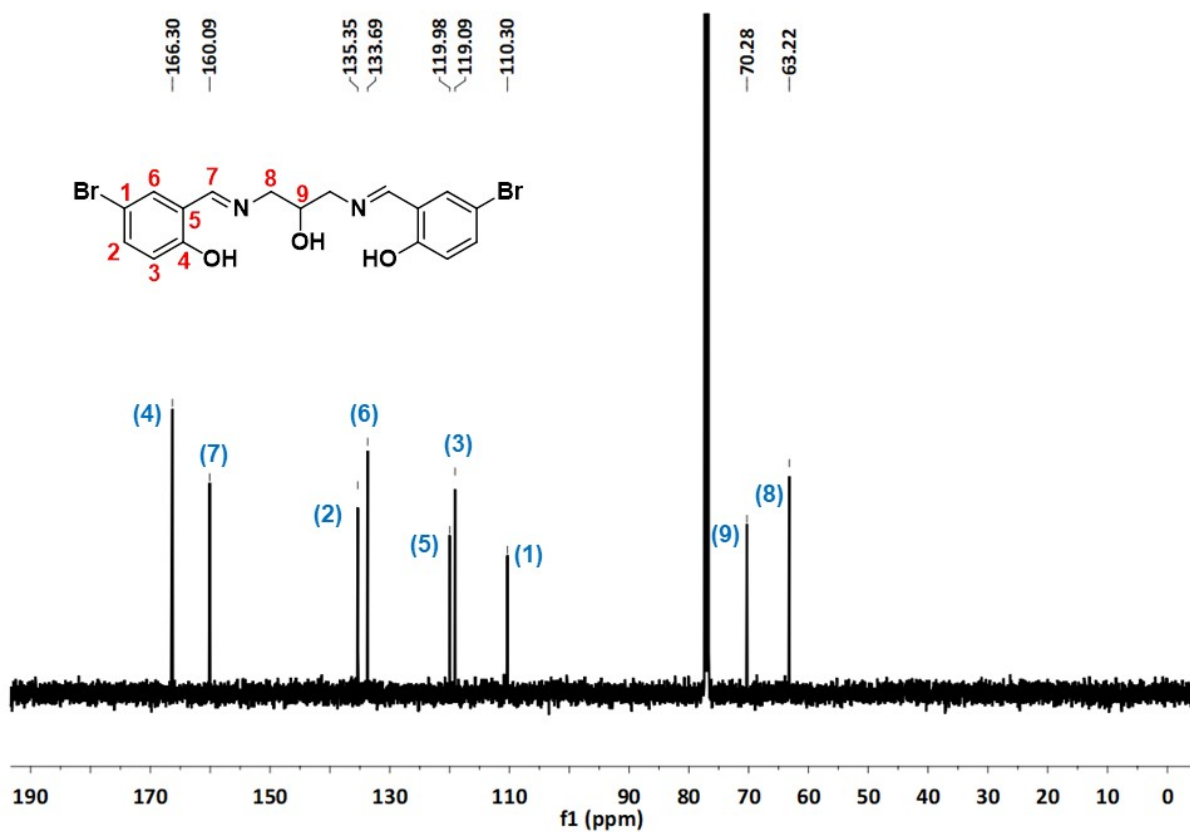

Fig. S17 <sup>13</sup>C NMR spectrum (125 MHz, CDCl<sub>3</sub>) of BSAL-DAP

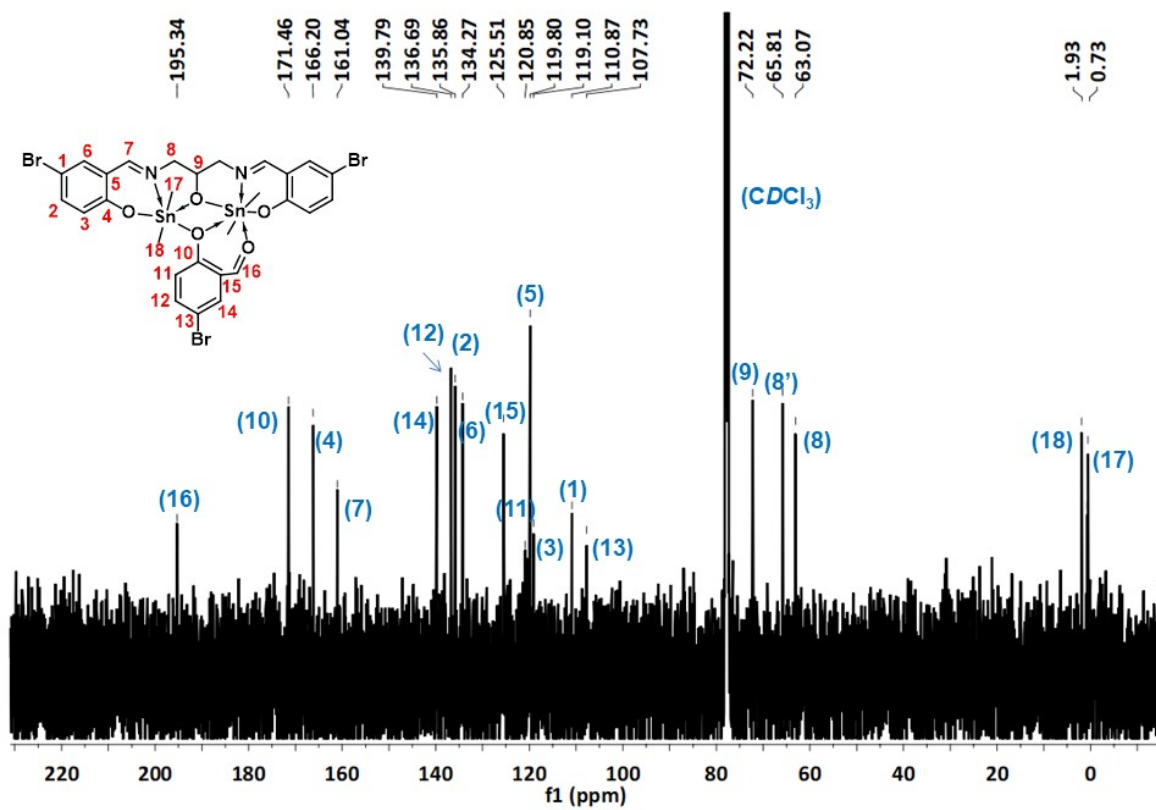

**Fig. S18** <sup>13</sup>C NMR spectrum (125 MHz, CDCl<sub>3</sub>) of [Me<sub>2</sub>Sn<sub>2</sub>(BSAL-DAP)(BSAL)]

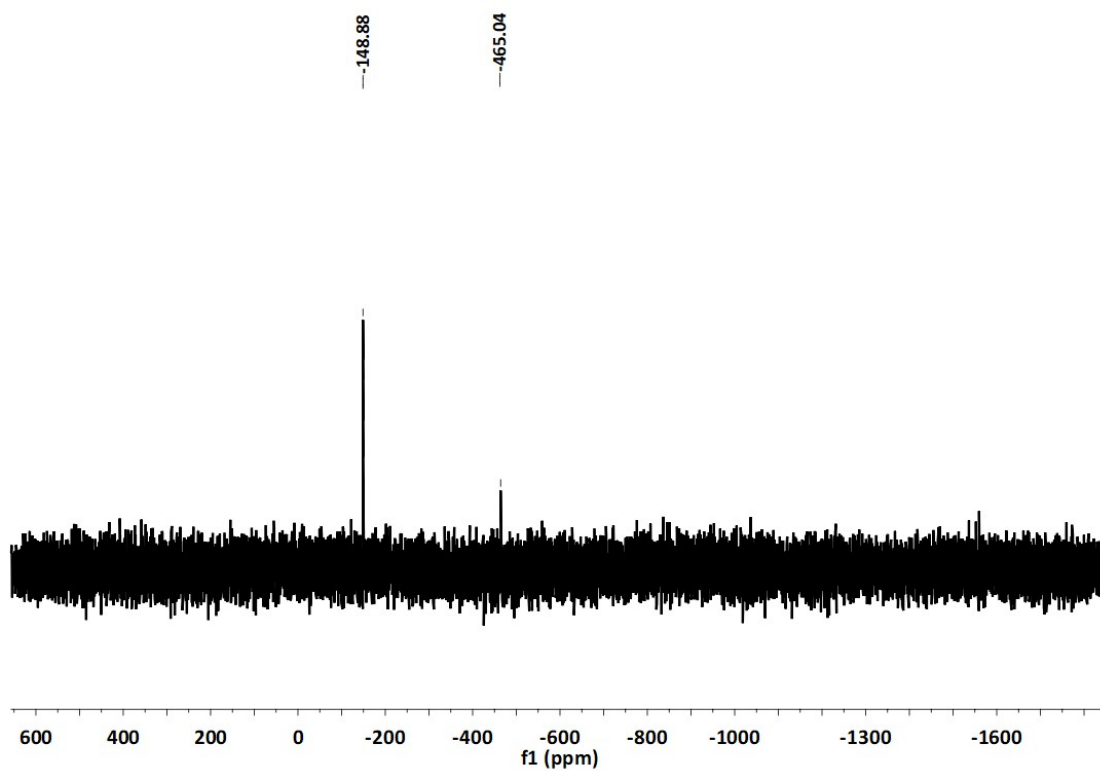

**Fig. S19**  $^{119}\text{Sn}$  NMR spectrum (186 MHz,  $\text{CDCl}_3$ ) of  $[\text{Me}_2\text{Sn}_2(\text{BSAL-DAP})(\text{BSAL})]$

SAHIL\_SAL\_DP\_7 (0.128) Cm (6:8)

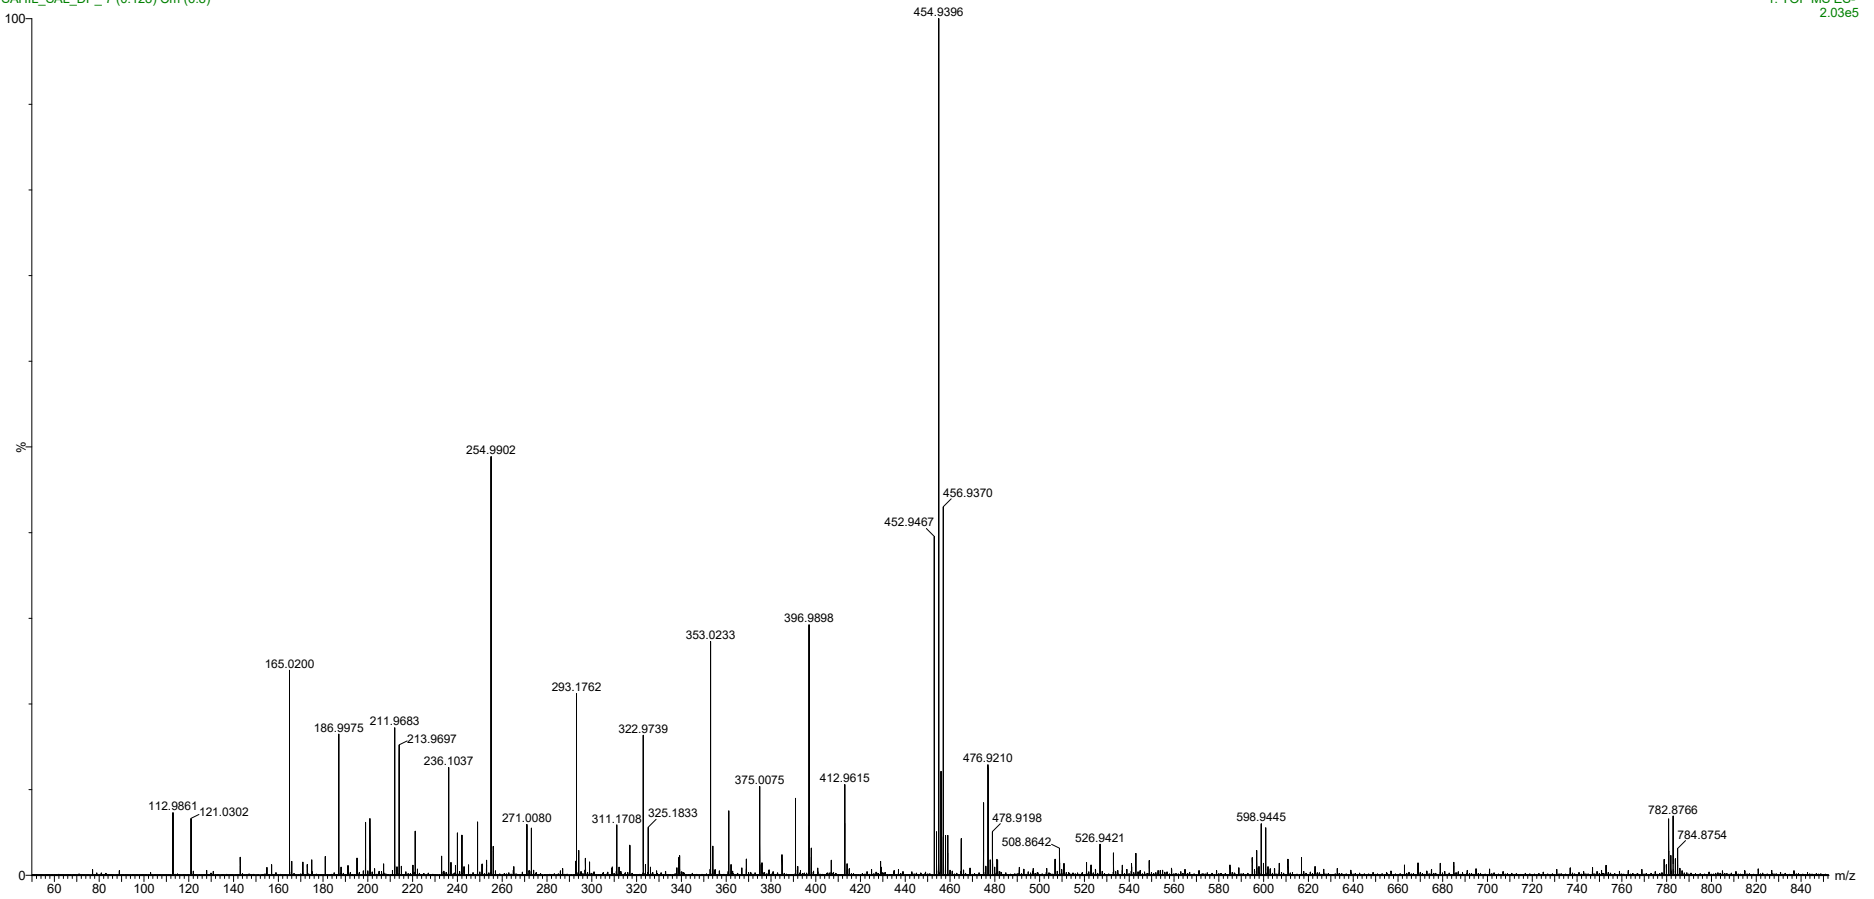

Fig. S20 ESI-MS spectrum of BSAL-DAP

SAIF,PANJAB UNIVERSITY,CHANDIGARH

JYOTI\_SB(0.120) Cm (4:7)

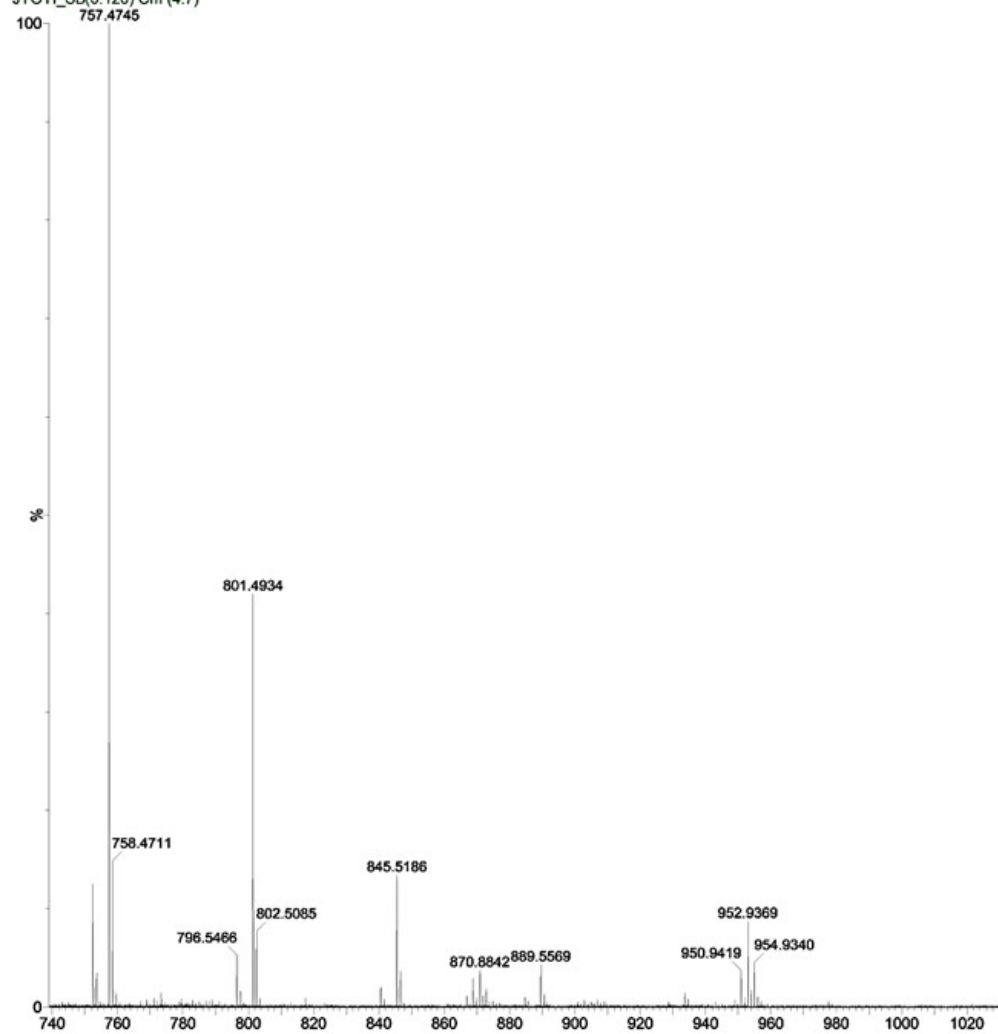

Fig. S21 ESI-MS spectrum of  $[\text{Me}_2\text{Sn}_2(\text{BSAL-DAP})(\text{BSAL})]$

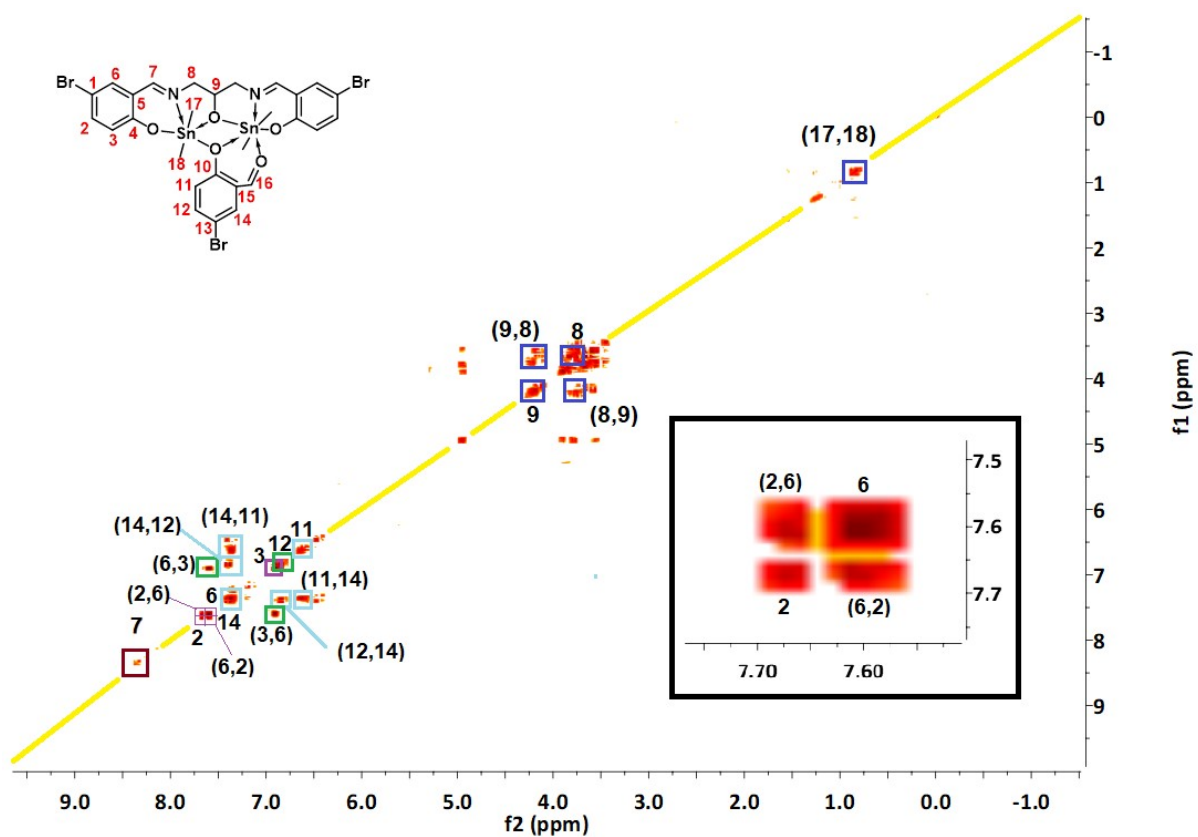

Fig. S22 ( $^1\text{H}$ - $^1\text{H}$ ) COSY NMR of Sn compound 2.

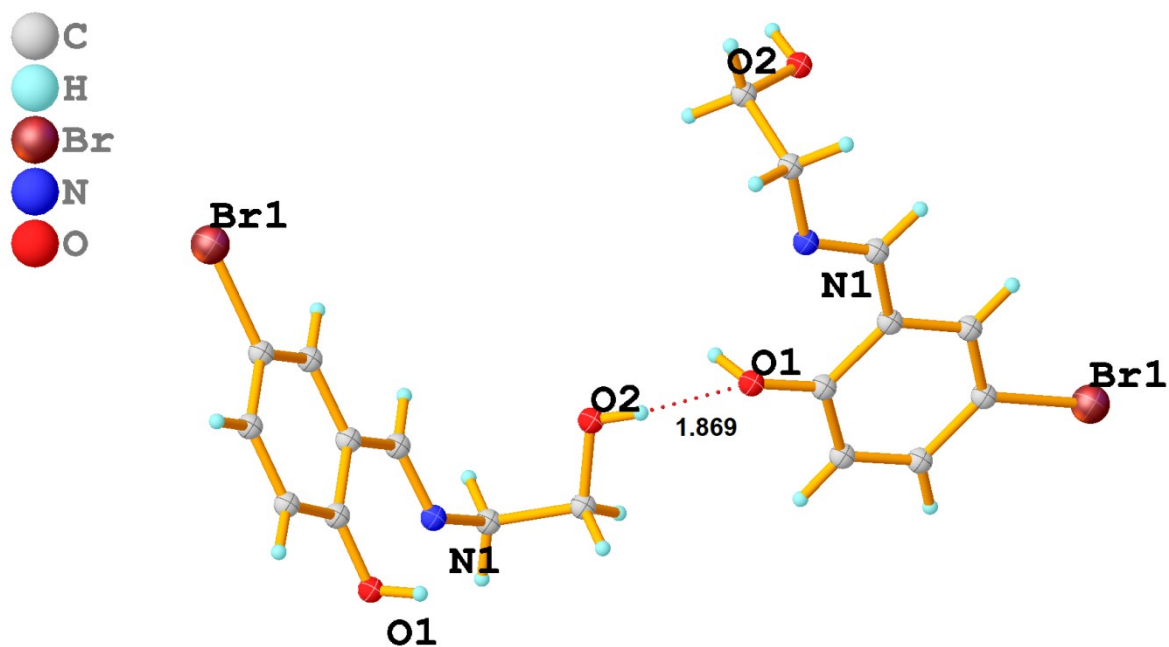

Fig. S23 ORTEP representation of BSAL-EA showing intermolecular hydrogen bonding,



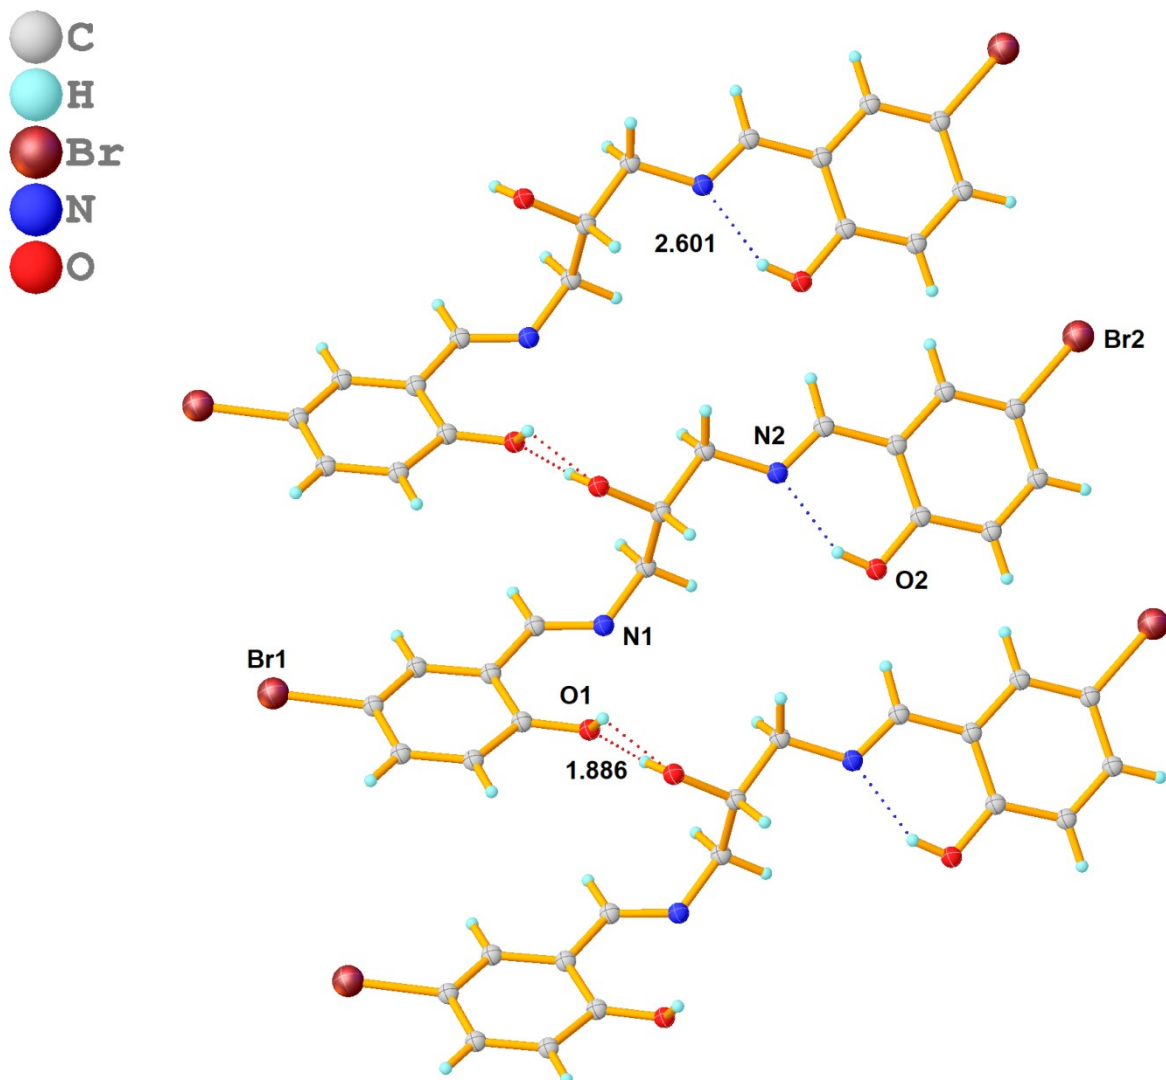

**Fig. S24** ORTEP representation of BSAL-DAP showing inter-/intra-molecular hydrogen bonding,

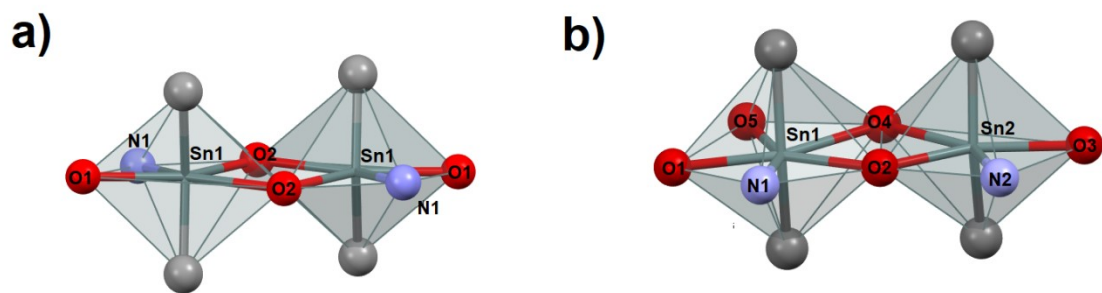

**Fig. S25** a) topographical view of coordination in Compound 1, and b) topographical view of coordination in Compound 2 (for non-hydrogen atoms, the radius of hydrogen atoms was eliminated for clarity).

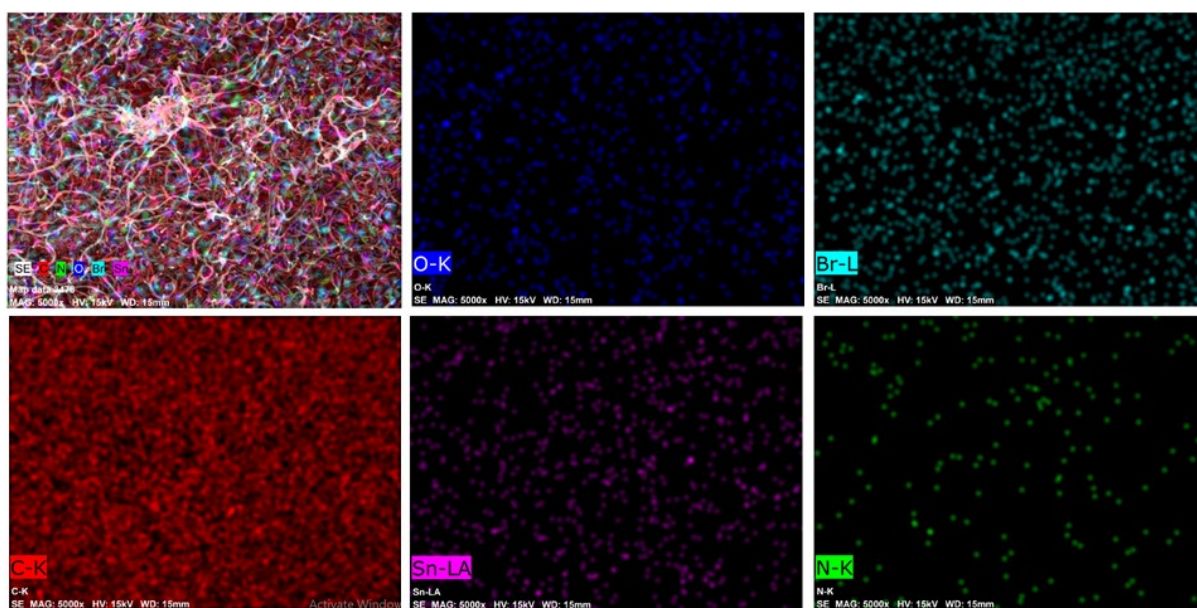

**Fig. S26** Elemental mapping of all elements of the 1@CNT (C, O, N, Br, and Sn) at the surface.

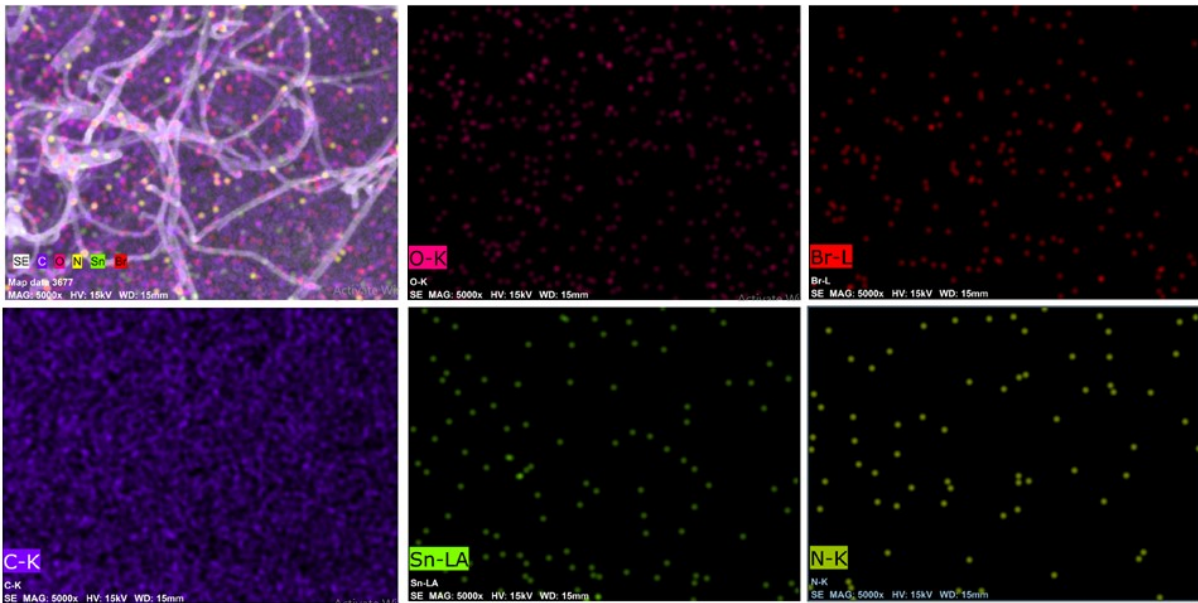

**Fig. S27** Elemental mapping of all elements of the 2@CNT (C, O, N, Br, and Sn) at the surface.

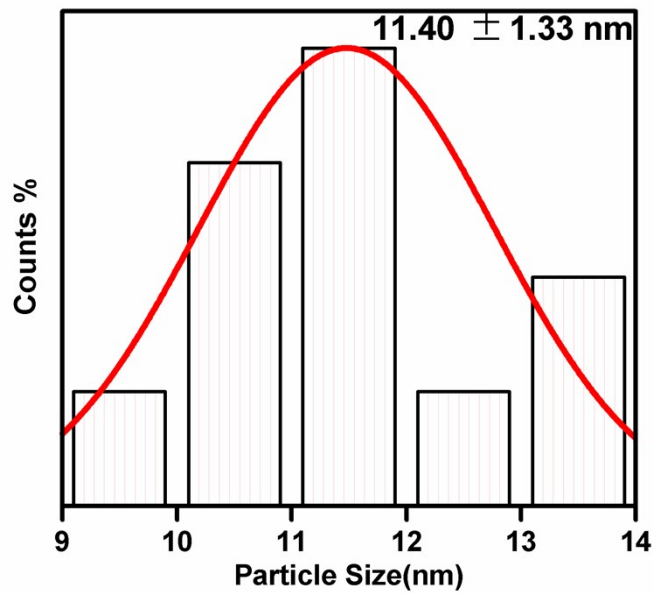

**Fig. S28** Particle size distribution of 2@CNT

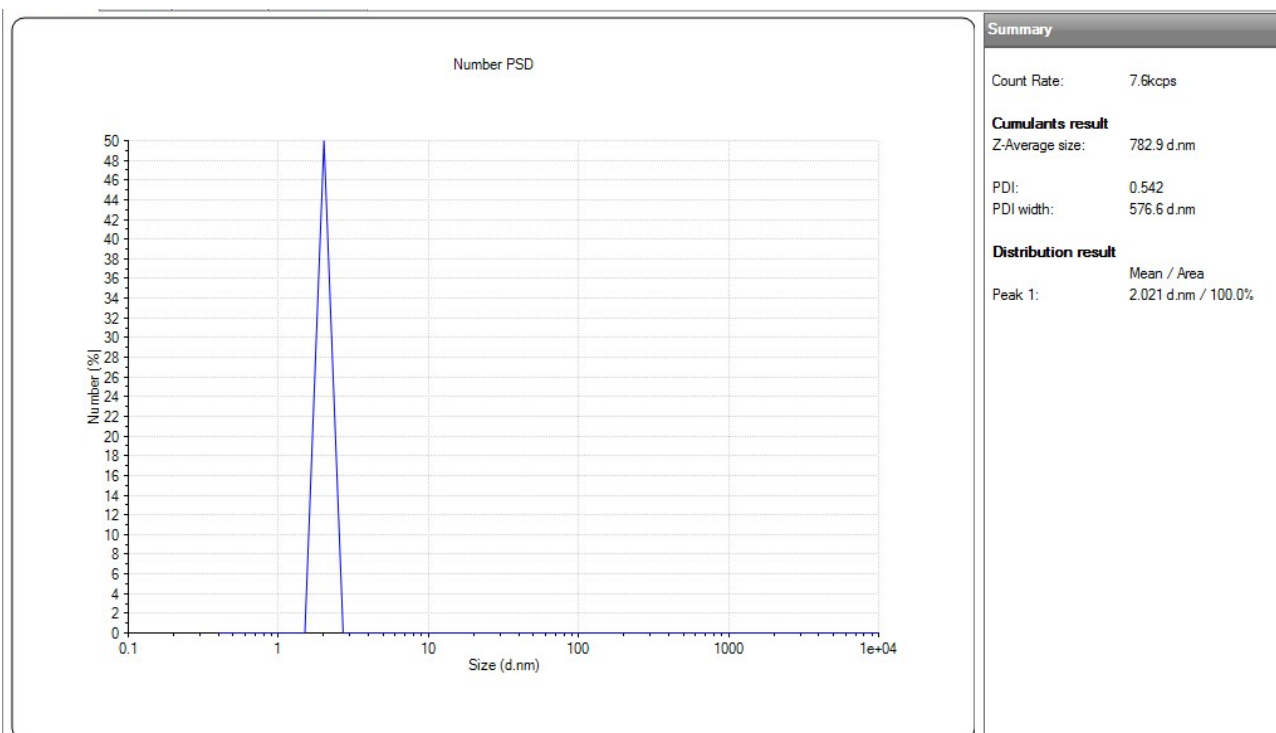

**Fig. S29** DLS particle size distribution of compound 1

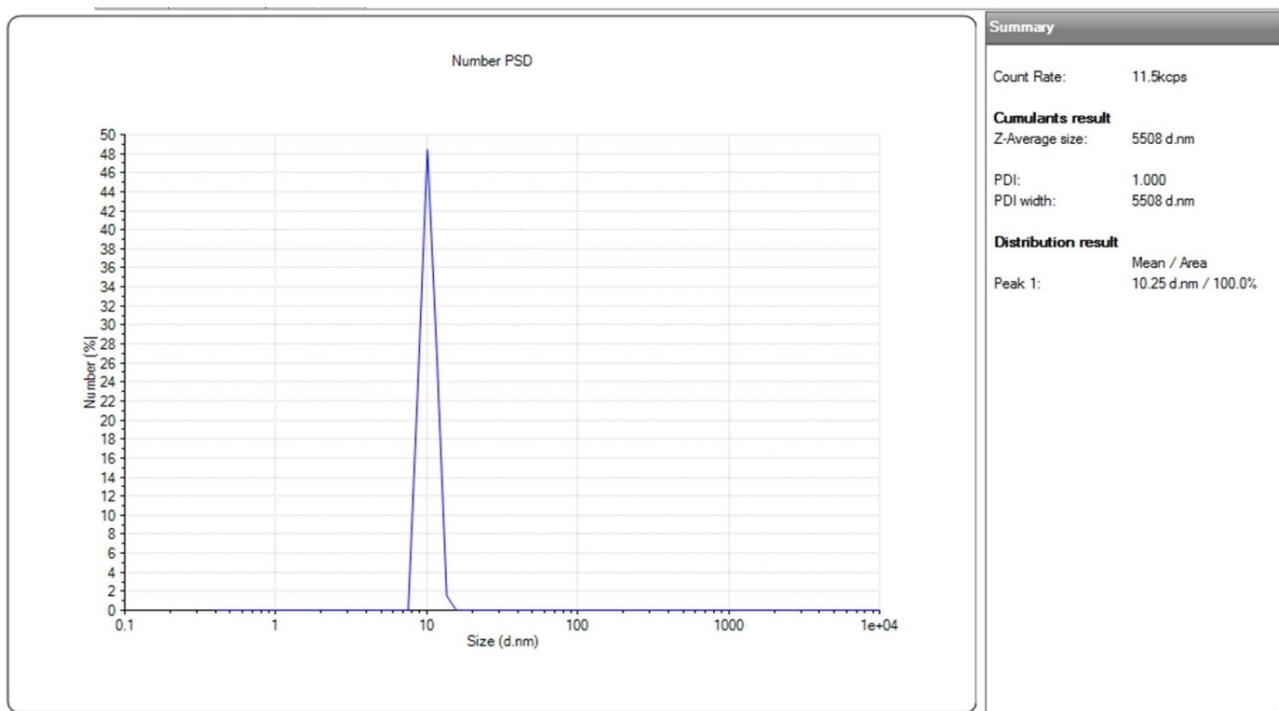

**Fig. S30** DLS particle size distribution of compound 2

|                                | Size (d.nm):         | % Volume: | St Dev (d.nm): |
|--------------------------------|----------------------|-----------|----------------|
| <b>Z-Average (d.nm):</b> 805.2 | <b>Peak 1:</b> 207.9 | 100.0     | 28.10          |
| <b>Pdl:</b> 0.956              | <b>Peak 2:</b> 0.000 | 0.0       | 0.000          |
| <b>Intercept:</b> 0.962        | <b>Peak 3:</b> 0.000 | 0.0       | 0.000          |

**Result quality :** Refer to quality report

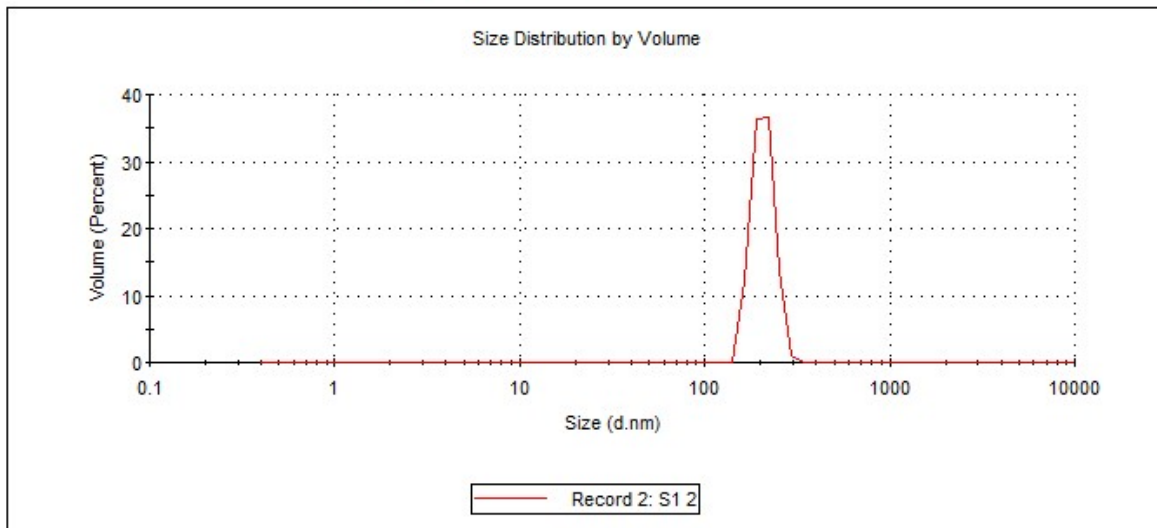

**Fig. S31** DLS particle size distribution of 1@CNT

|                                | Size (d.nm):         | % Volume: | St Dev (d.nm): |
|--------------------------------|----------------------|-----------|----------------|
| <b>Z-Average (d.nm):</b> 636.8 | <b>Peak 1:</b> 566.1 | 100.0     | 77.55          |
| <b>Pdl:</b> 0.741              | <b>Peak 2:</b> 0.000 | 0.0       | 0.000          |
| <b>Intercept:</b> 0.823        | <b>Peak 3:</b> 0.000 | 0.0       | 0.000          |

**Result quality :** Refer to quality report

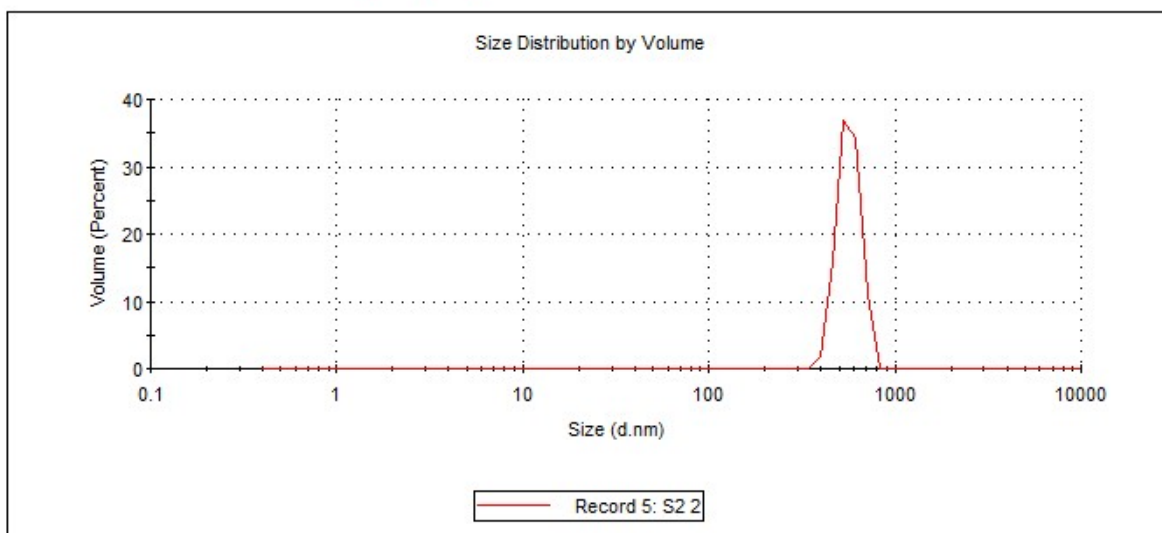

**Fig. S32** DLS particle size distribution of 2@CNT

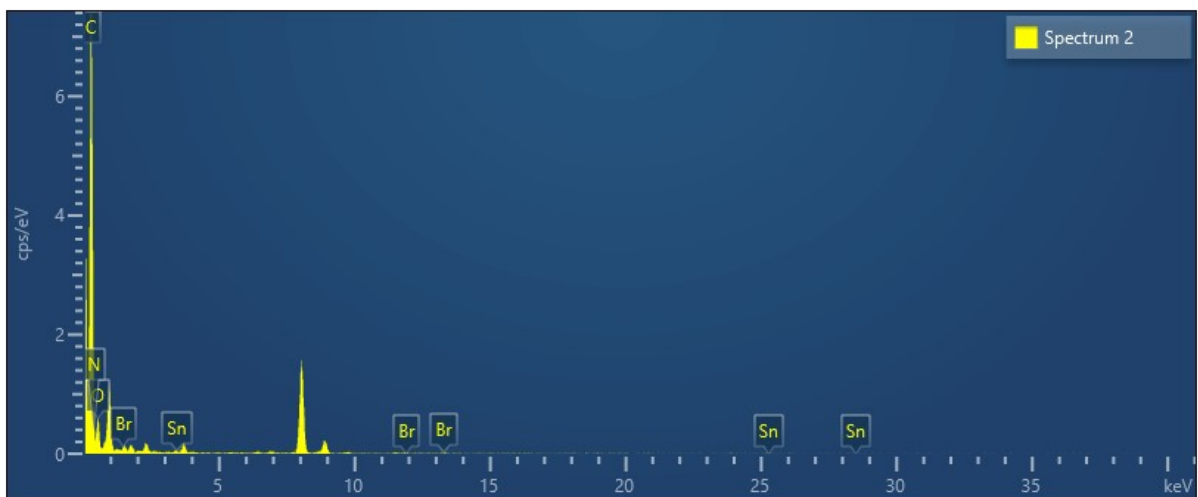

**Fig. S33** EDAX distribution of 1@CNT

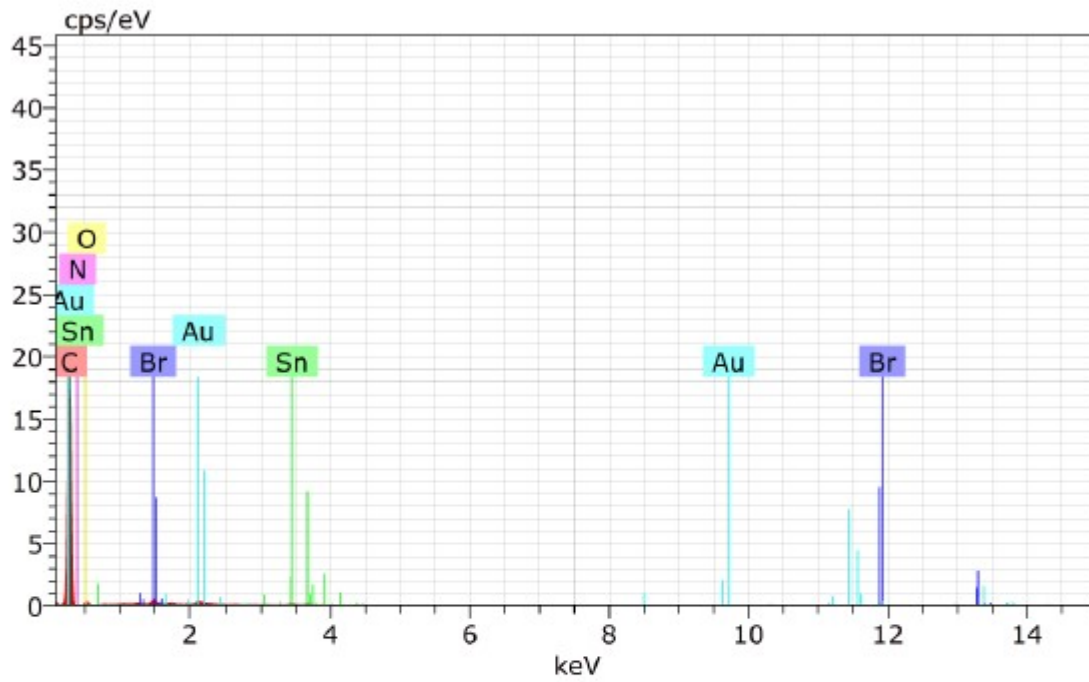

Spectrum: test 17394

| Element  | Series   | unn. C<br>[wt.%] | norm. C<br>[wt.%] | Atom. C<br>[at.%] | Error (3 Sigma)<br>[wt.%] |
|----------|----------|------------------|-------------------|-------------------|---------------------------|
| Carbon   | K-series | 85.40            | 85.40             | 92.92             | 29.29                     |
| Tin      | L-series | 2.15             | 2.15              | 0.24              | 0.34                      |
| Bromine  | L-series | 2.06             | 2.06              | 0.34              | 0.41                      |
| Gold     | M-series | 2.92             | 2.92              | 0.19              | 0.46                      |
| Nitrogen | K-series | 1.82             | 1.82              | 1.70              | 2.11                      |
| Oxygen   | K-series | 5.65             | 5.65              | 4.62              | 3.30                      |
| Total:   |          | 100.00           | 100.00            | 100.00            |                           |

Activate 'Go to Settin

Fig. S34 EDAX distribution of 2@CNT

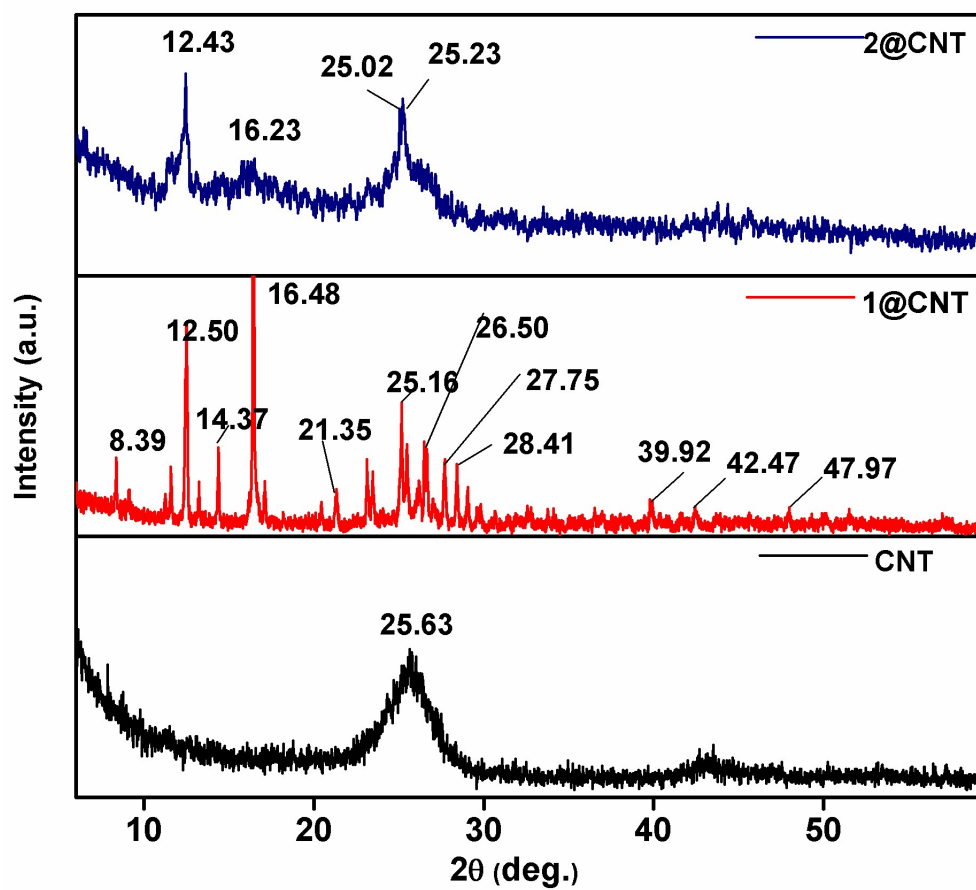

Fig. S35. PXRD pattern showing a comparison of data for a) CNT, b) 1@CNT, and c) 2@CNT.



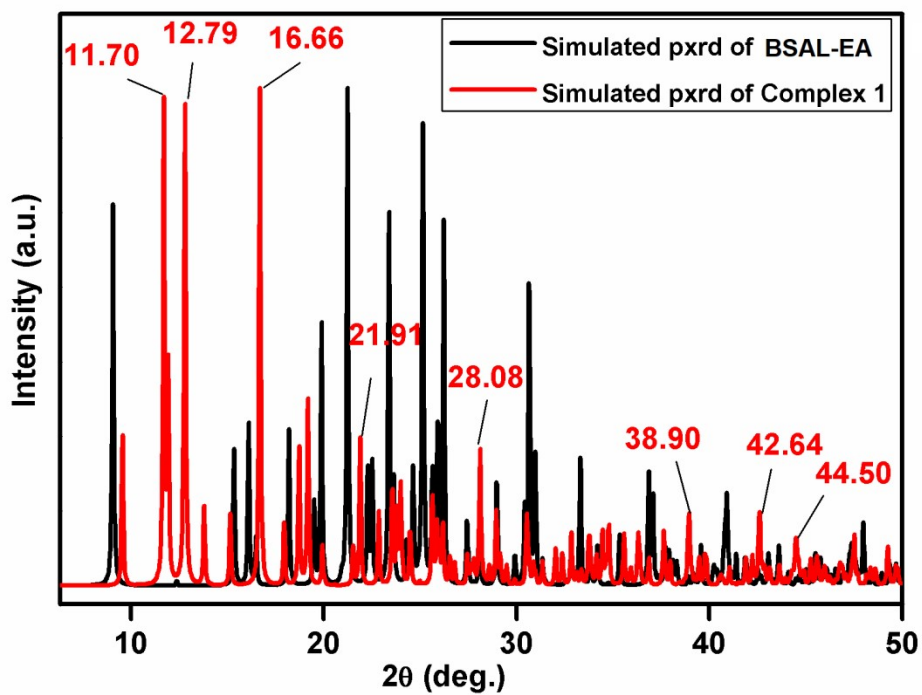

Fig. S36 Simulated PXRD pattern comparison of BSAL-EA and organotin Complex 1

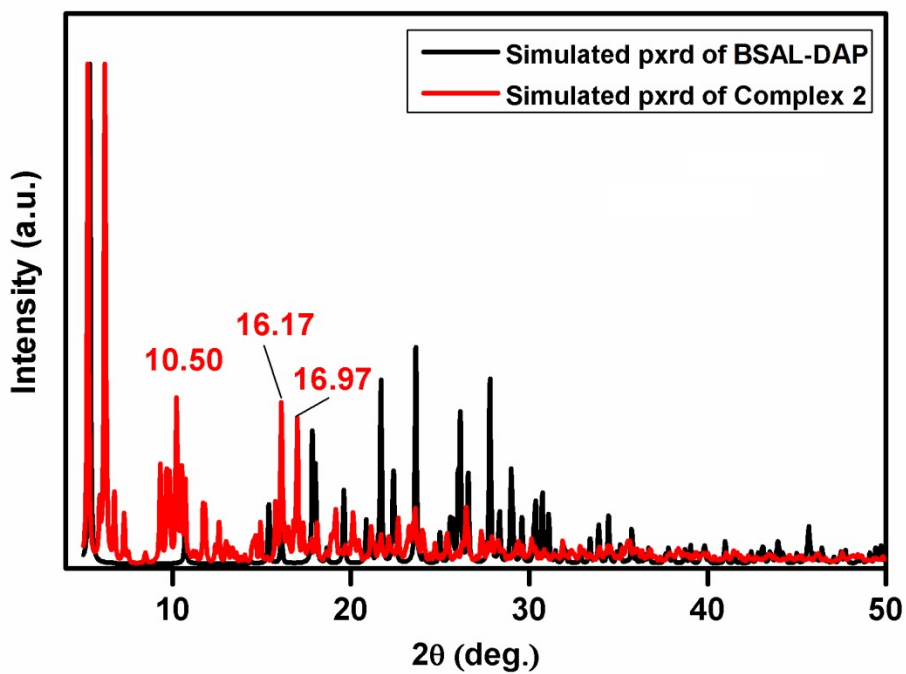

Fig. S37 Simulated PXRD pattern comparison of BSAL-DAP and organotin Complex 2

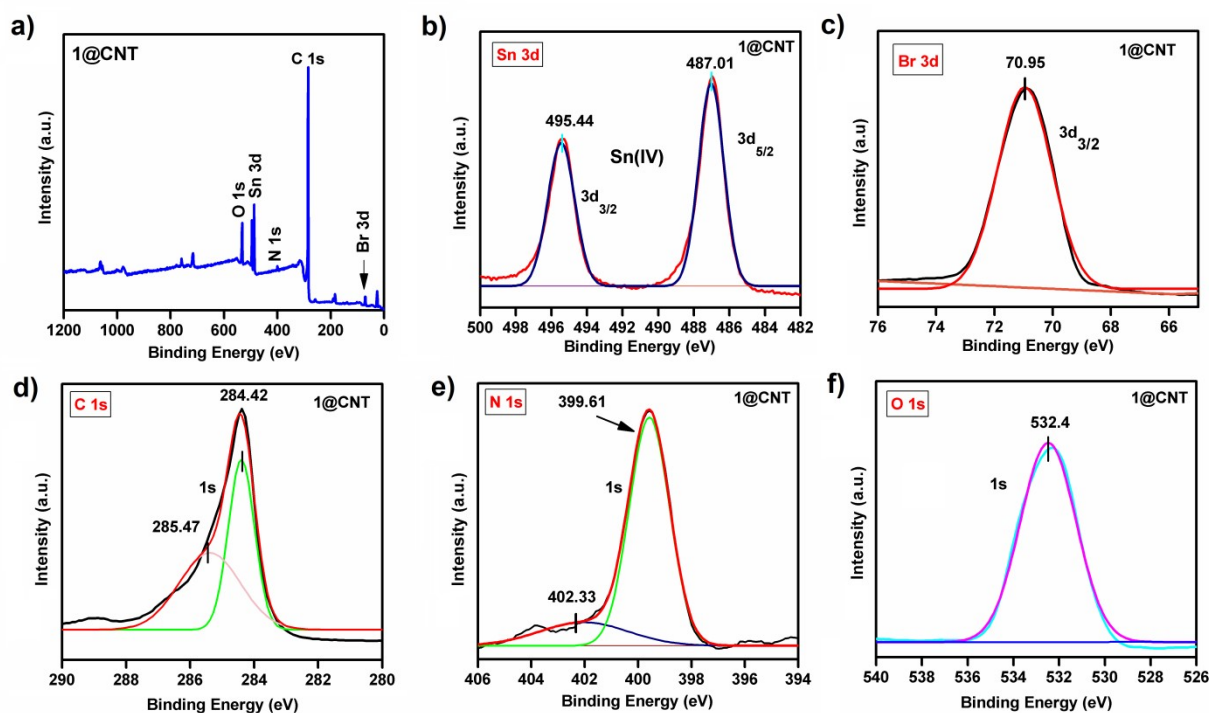

**Fig. S38** Xps spectra of 1@CNT showing presence Sn 3d, Br 3d, C 1s, N 1s, and O 1s elements

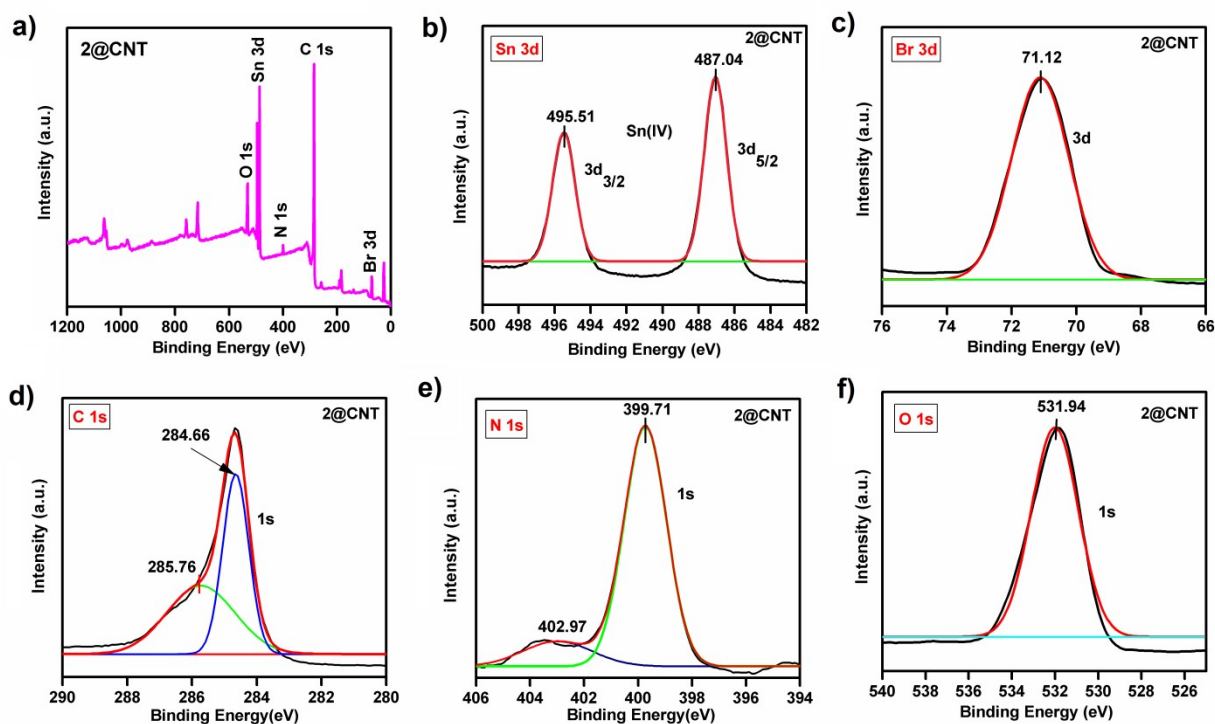

**Fig. S39** Xps spectra of 2@CNT showing presence Sn 3d, Br 3d, C 1s, N 1s, and O 1s elements.

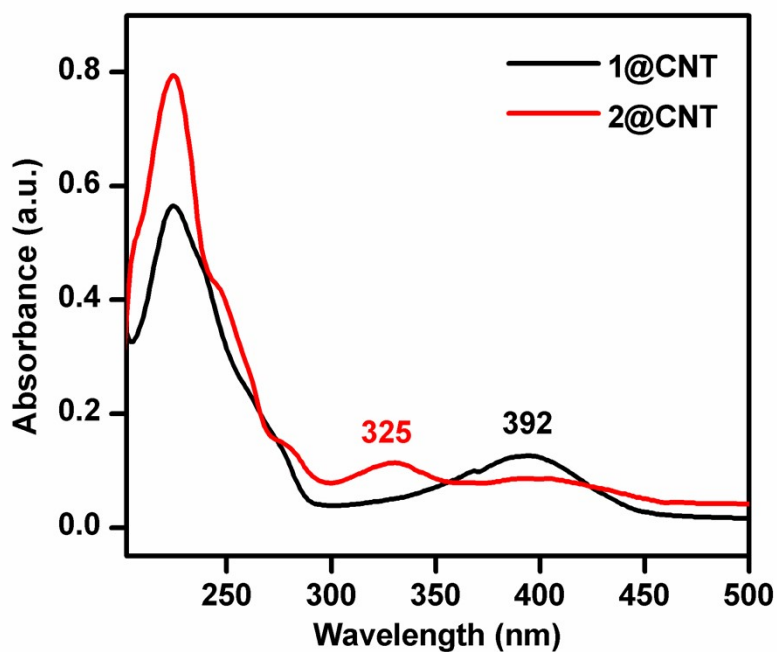

Fig. S40 UV absorption spectrum of 1@CNT and 2@CNT

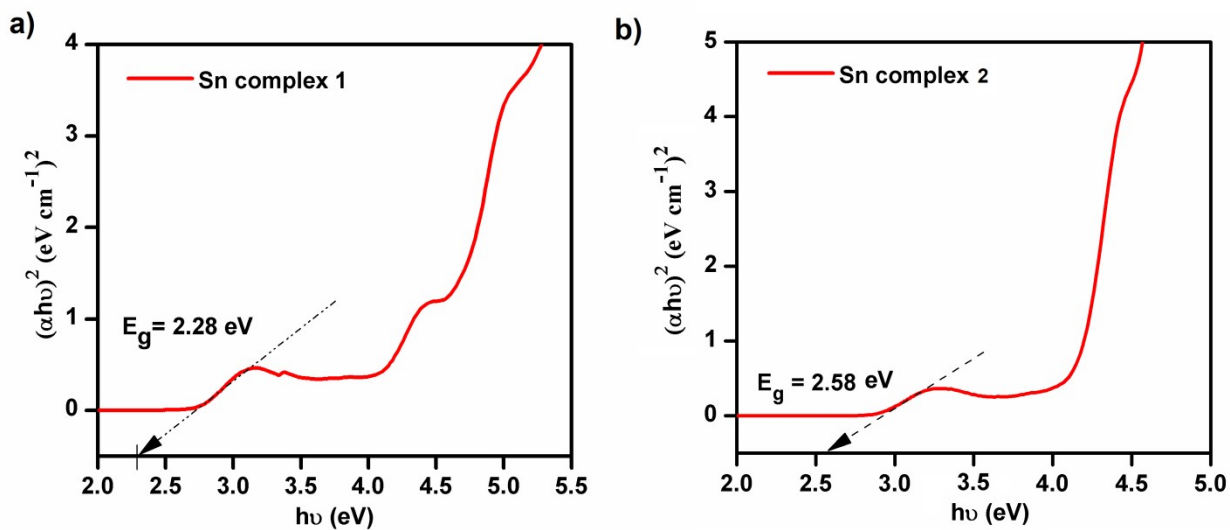

Fig. S41 Tauc plot of synthesized Sn complex 1 and 2, showing bandgap  $E_g$

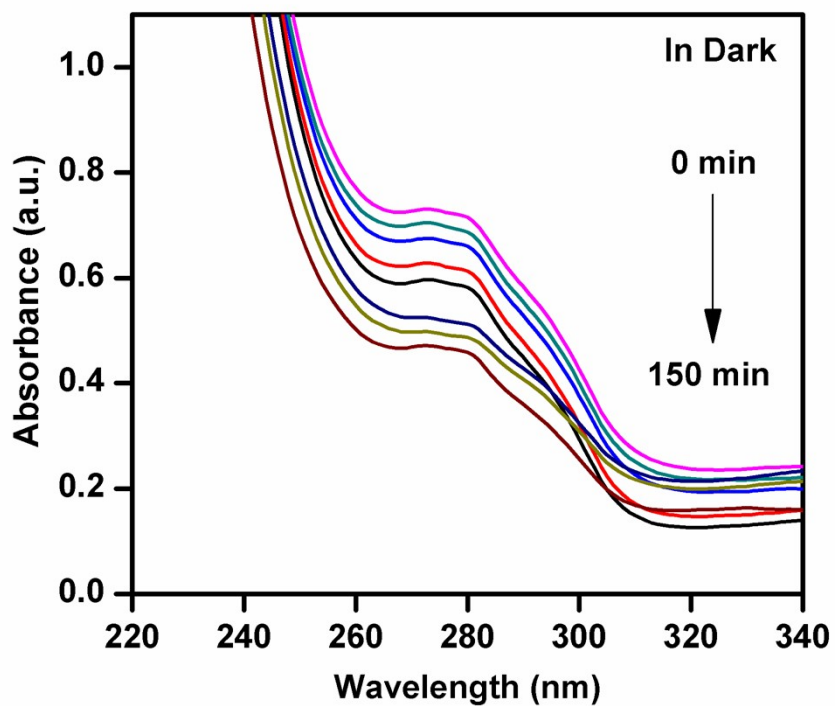

Fig. S42 Absorption spectra of AMX photocatalytic degradation under dark

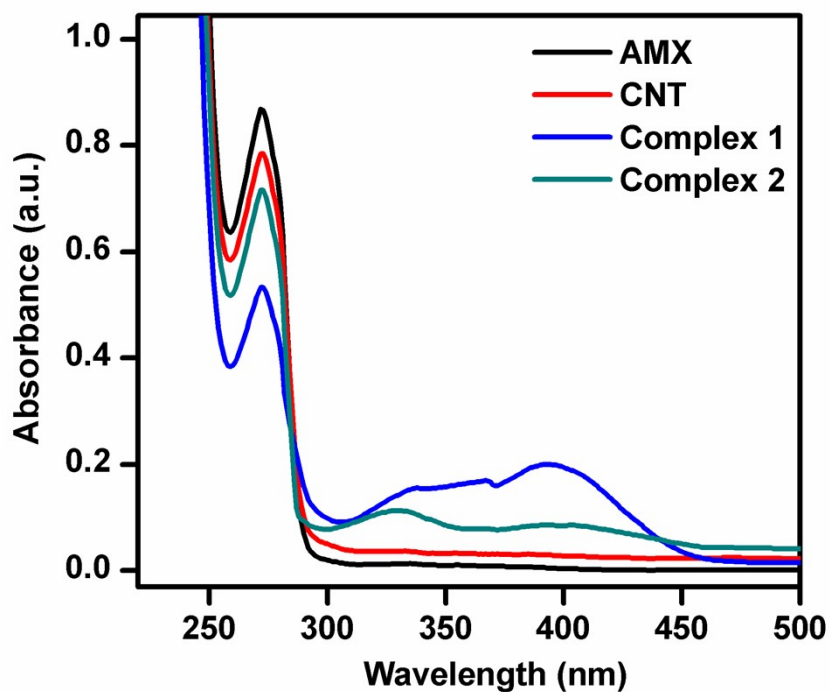

Fig. S43 Absorption spectra of AMX photocatalytic degradation using CNT, Complex 1, and Complex 2.

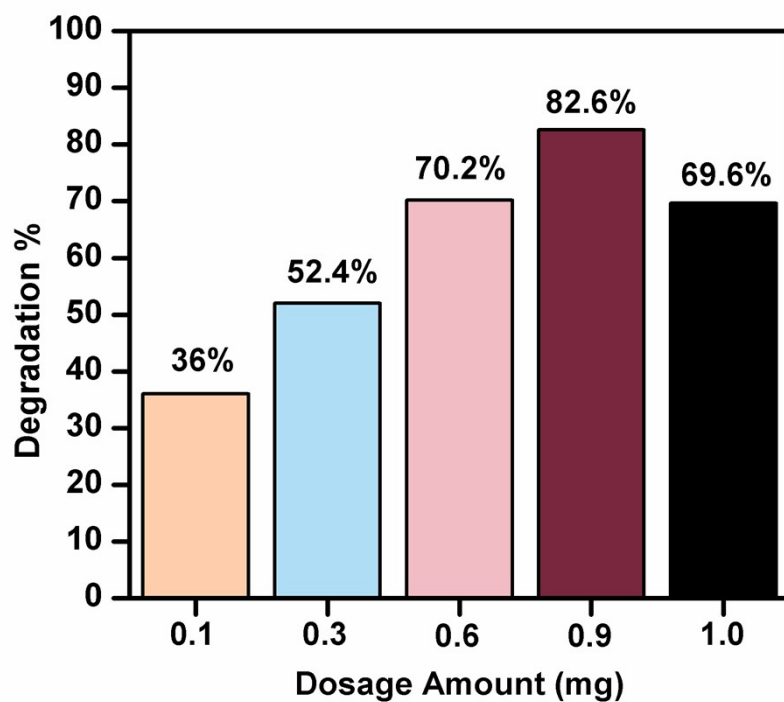

Fig. S44 Effect of dosage amount of 1@CNT on AMX degradation

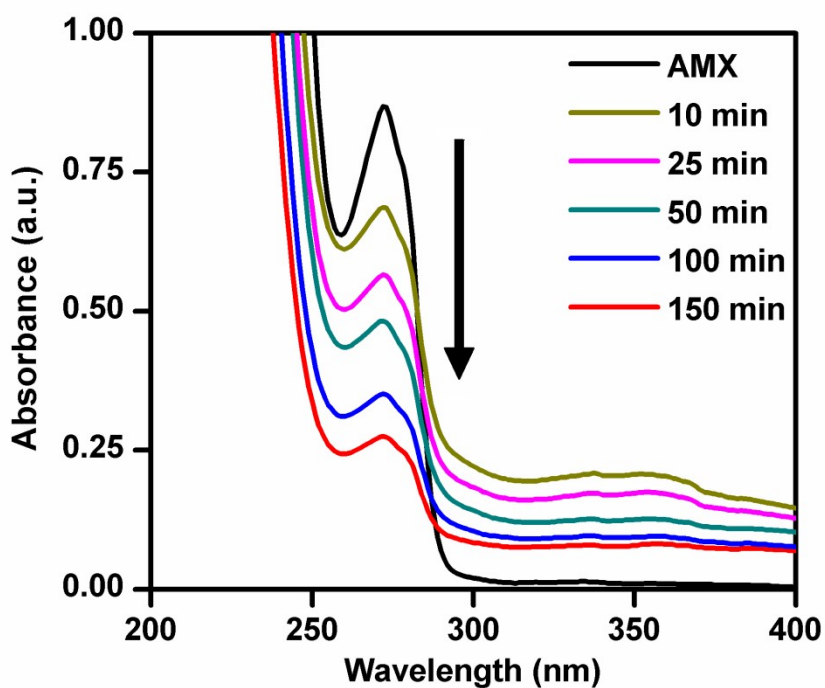

Fig. S45 Absorption spectra of AMX photocatalytic degradation using TiO<sub>2</sub> as positive control.

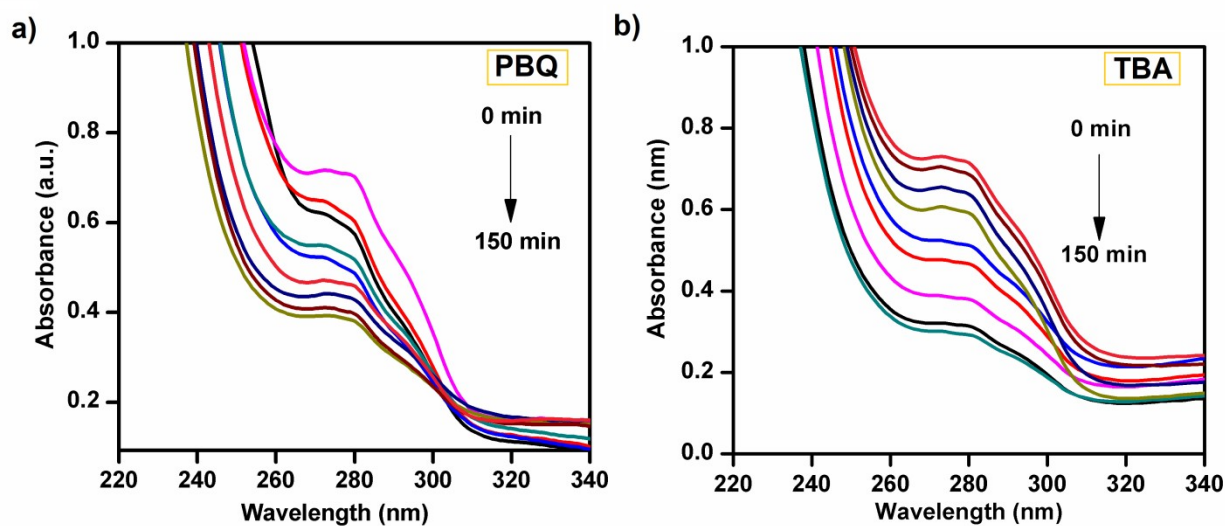

**Fig. S46** Absorption spectra of AMX photocatalytic degradation under visible light irradiation in presence of radical scavengers a) p-benzoquinone (PBQ) and b) tertbutyl alcohol (TBA).

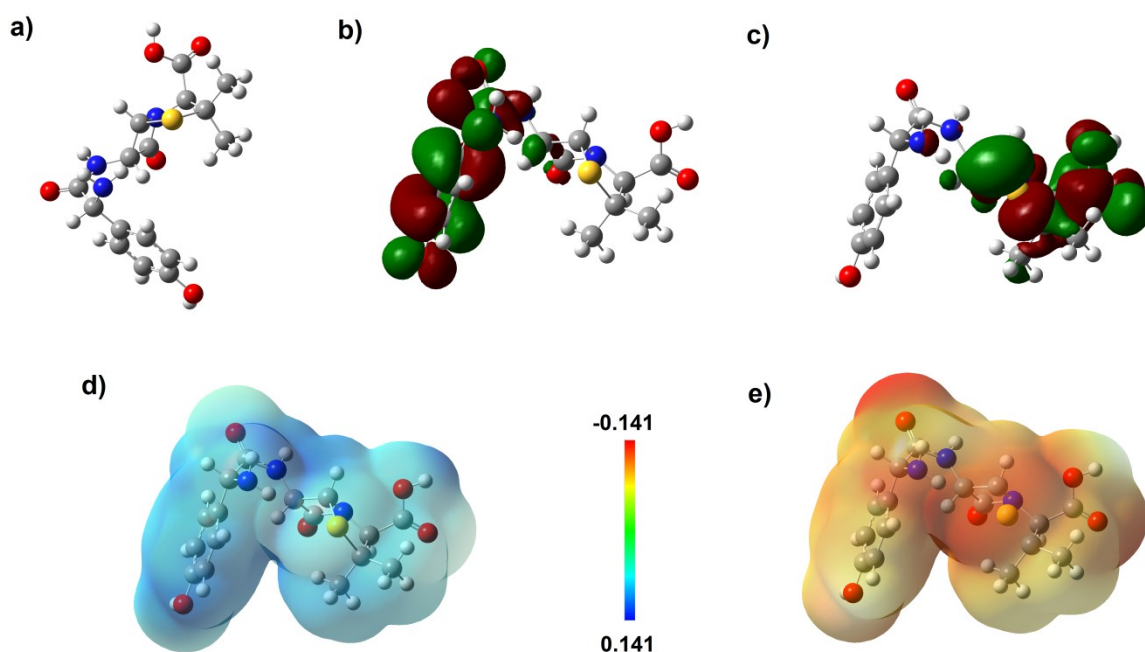

**Fig. S47** a) DFT optimized structure of Amoxicillin using basis set 6-31g+(d,p), DFT calculated b) HOMO and c) LUMO molecular orbitals, Electrostatic potential (ESP) of Fukui function for d) nucleophilic attack ( $F^+$ ) and e) electrophilic attack ( $F^-$ ).

SAHIL\_AMX\_DEG 12 (0.212) Cm (9:17)

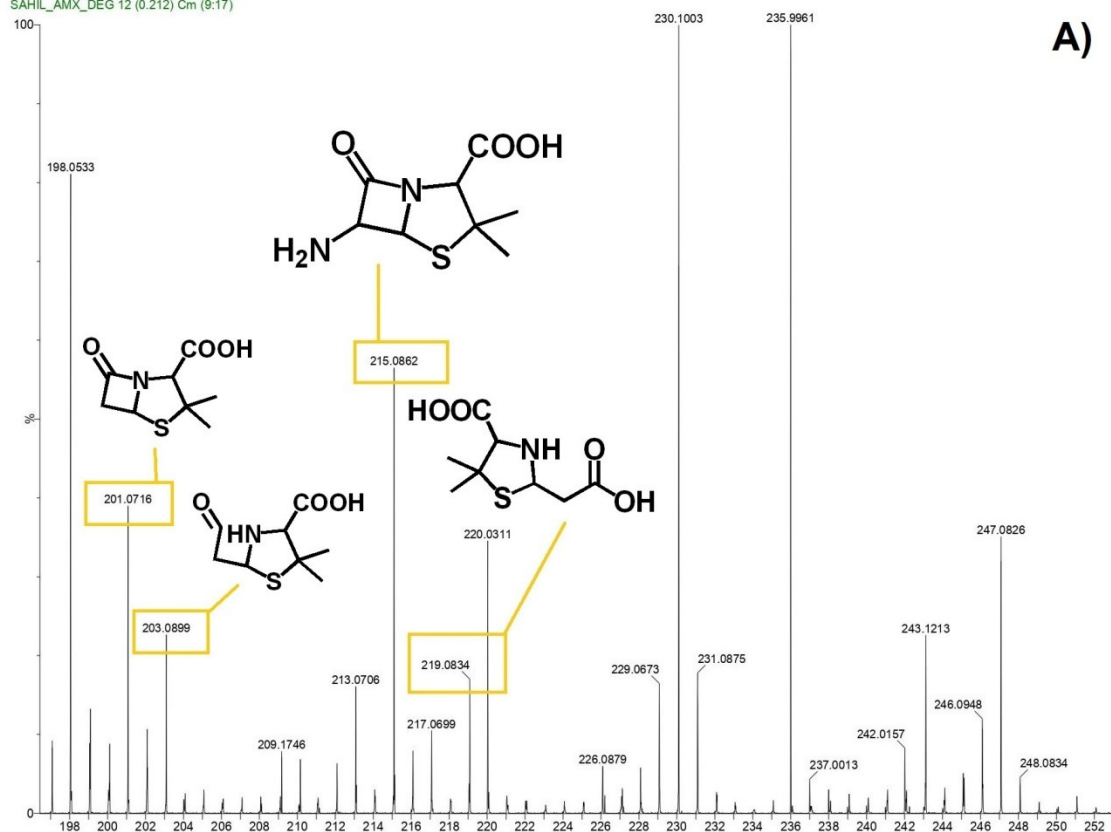

SAHIL\_AMX\_DEG 12 (0.212) Cm (9:17)

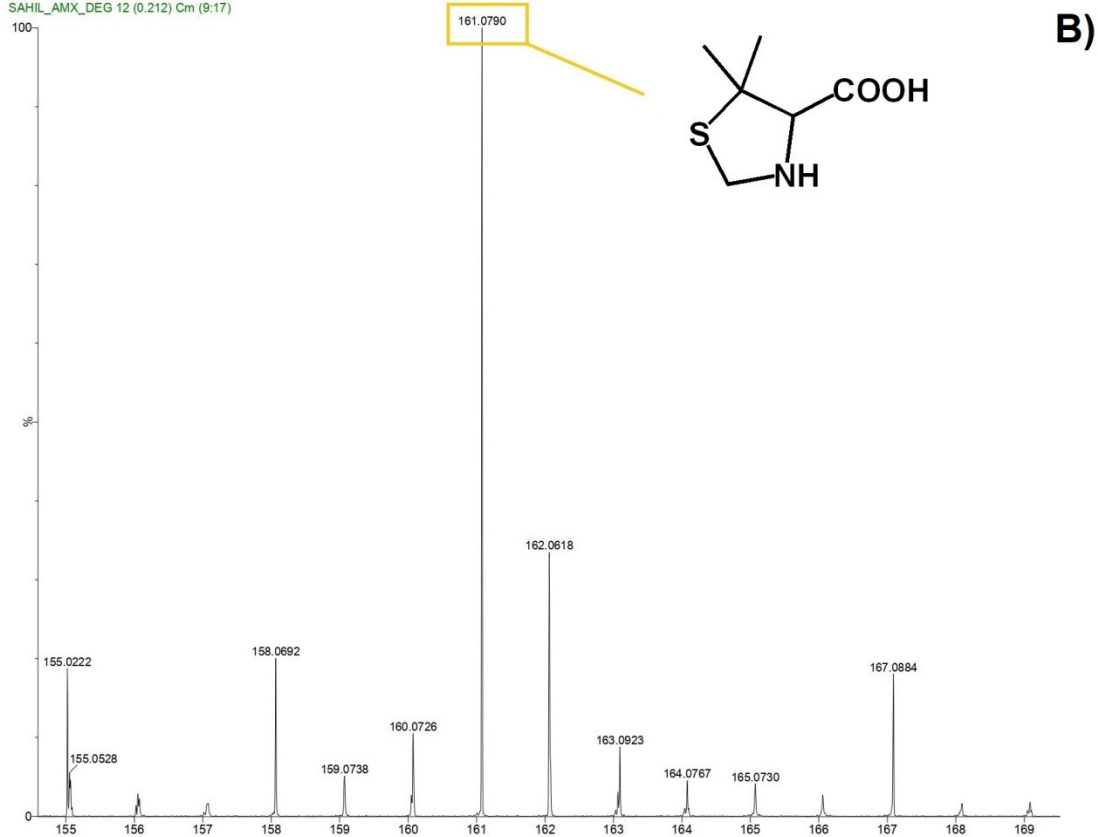

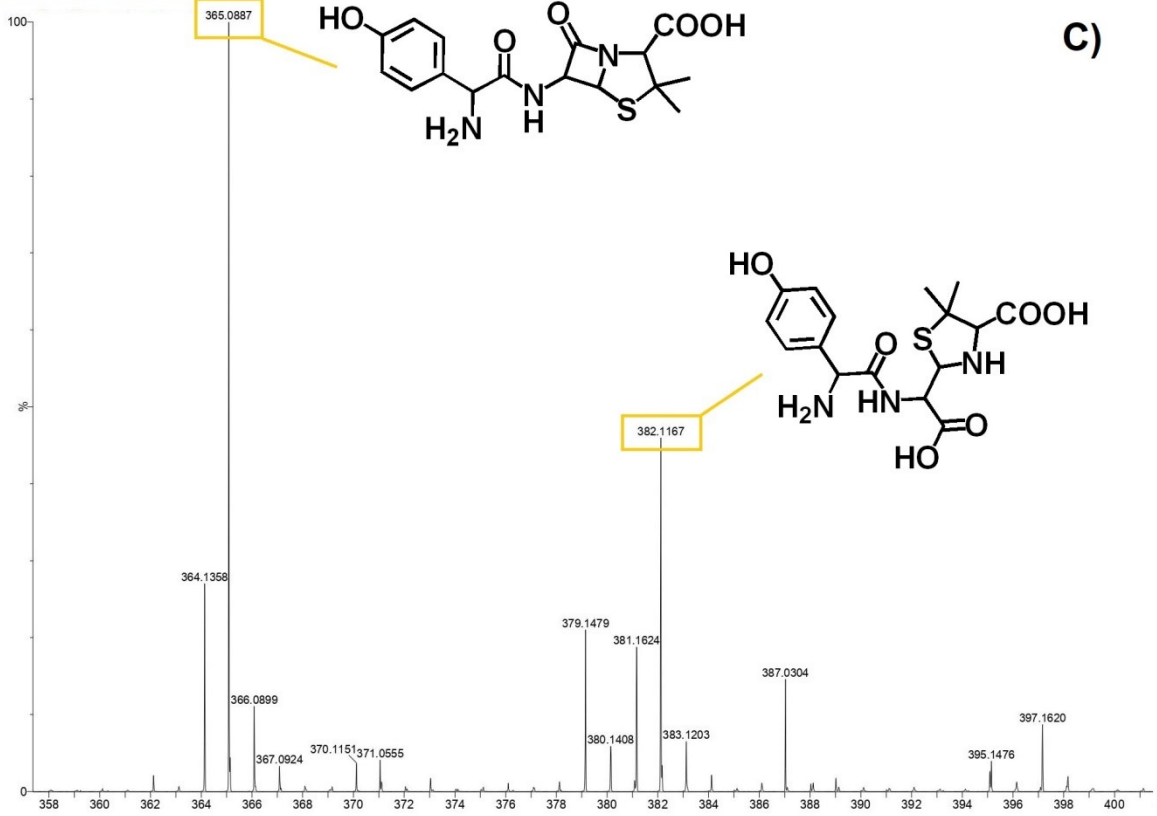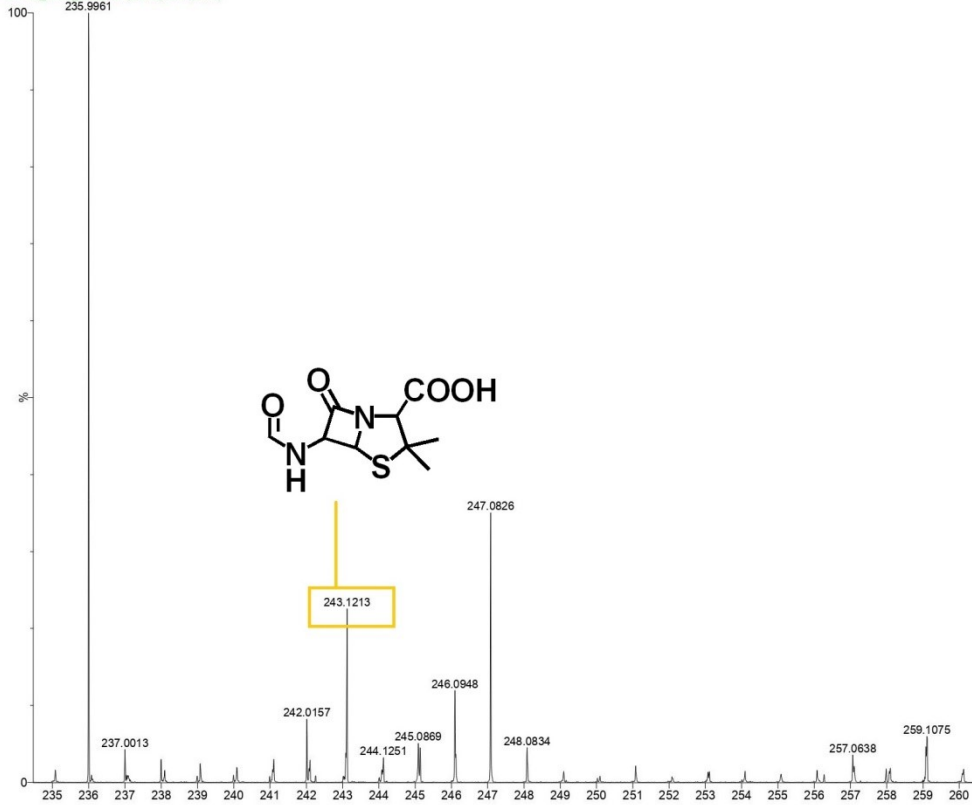



SAHIL\_AMX\_DEG 12 (0.212) Cm (9:17)

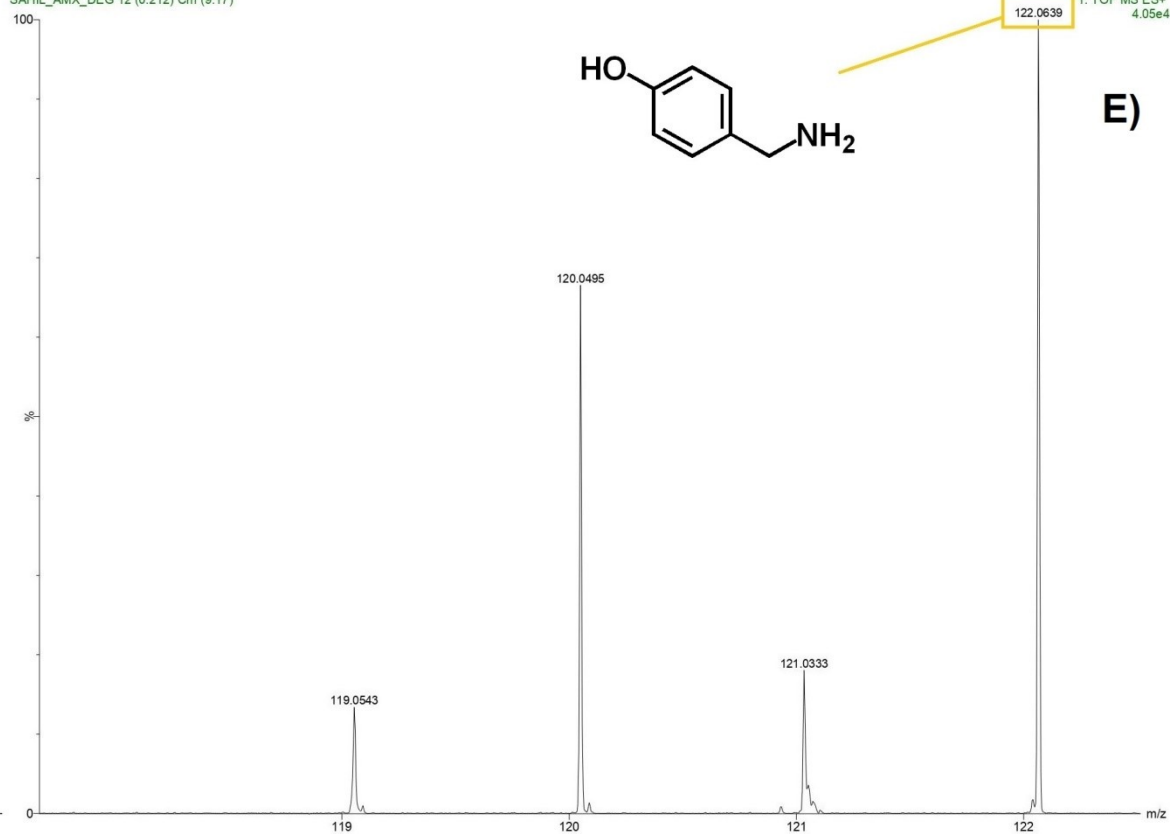

**Fig. S48** AMX degradation products by HPLC-MS (A-E)

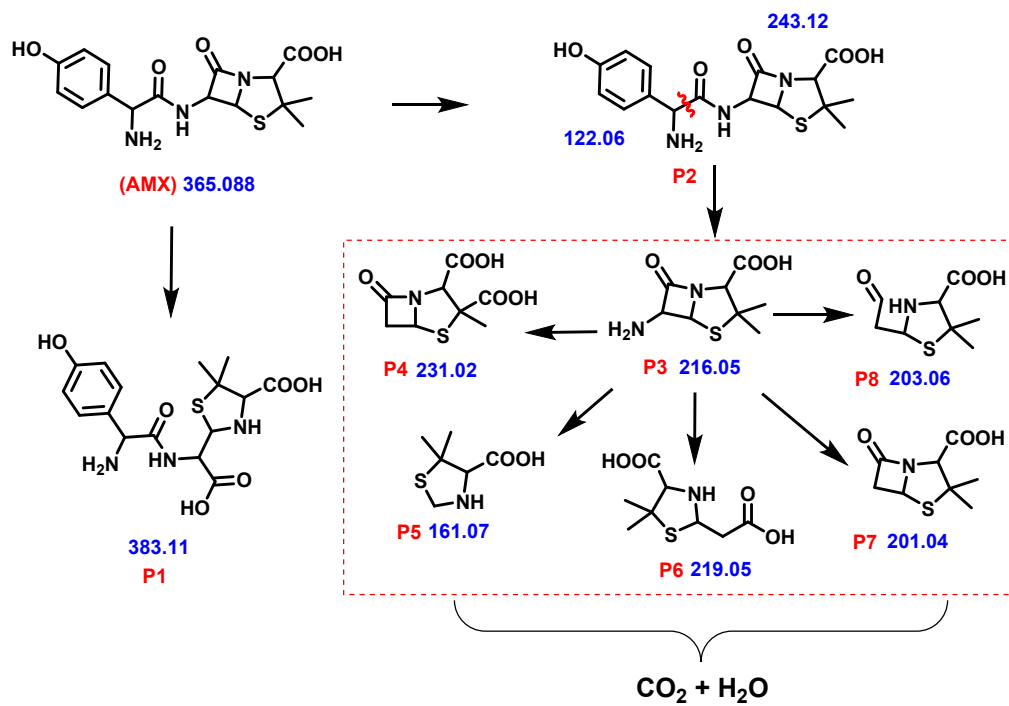

Fig. S49 Proposed degradation pathway of AMX.

**Table S1** Crystallographic data and structural parameters for Ligands BSAL-EA and BSAL-DAP, Complexes 1 and 2.

| PARAMETERS                         | BSAL-EA                                                          | BSAL-DAP                                                                      | Complex 1                                                                                     | Complex 2                                                                                        |
|------------------------------------|------------------------------------------------------------------|-------------------------------------------------------------------------------|-----------------------------------------------------------------------------------------------|--------------------------------------------------------------------------------------------------|
| Empirical formula                  | C <sub>9</sub> H <sub>10</sub> BrNO <sub>2</sub>                 | C <sub>17</sub> H <sub>16</sub> Br <sub>2</sub> N <sub>2</sub> O <sub>3</sub> | C <sub>24</sub> H <sub>34</sub> Br <sub>2</sub> N <sub>2</sub> O <sub>6</sub> Sn <sub>2</sub> | C <sub>28</sub> H <sub>29</sub> Br <sub>3</sub> N <sub>2</sub> O <sub>5</sub><br>Sn <sub>2</sub> |
| Formula weight                     | 244.09                                                           | 456.14                                                                        | 843.73                                                                                        | 950.64                                                                                           |
| Temperature/K                      | 298                                                              | 298                                                                           | 175(20)                                                                                       | 236(100)                                                                                         |
| Crystal system                     | Monoclinic                                                       | Orthorhombic                                                                  | Triclinic                                                                                     | Monoclinic                                                                                       |
| Space group                        | P2 <sub>1</sub> /n                                               | Pca2 <sub>1</sub>                                                             | P-1                                                                                           | P2 <sub>1</sub> /n                                                                               |
| a/Å                                | 4.5073(2)                                                        | 8.4537(6)                                                                     | 8.1743(3)                                                                                     | 19.1383(15)                                                                                      |
| b/Å                                | 11.5418(3)                                                       | 6.1367(3)                                                                     | 9.9957(3)                                                                                     | 20.8486(12)                                                                                      |
| c/Å                                | 18.3112(6)                                                       | 33.002(2)                                                                     | 10.3362(4)                                                                                    | 28.771(2)                                                                                        |
| α/°                                | 90                                                               | 90                                                                            | 70.458(3)                                                                                     | 90                                                                                               |
| β/°                                | 96.065(3)                                                        | 90                                                                            | 67.582(4)                                                                                     | 97.455(7)                                                                                        |
| γ/°                                | 90                                                               | 90                                                                            | 72.878(3)                                                                                     | 90                                                                                               |
| Volume/Å <sup>3</sup>              | 947.26(6)                                                        | 1712.09(18)                                                                   | 722.13(5)                                                                                     | 11382.7(14)                                                                                      |
| Z                                  | 4                                                                | 4                                                                             | 1                                                                                             | 12                                                                                               |
| ρ <sub>calc</sub> /cm <sup>3</sup> | 1.712                                                            | 1.770                                                                         | 1.940                                                                                         | 1.664                                                                                            |
| μ/mm <sup>-1</sup>                 | 4.305                                                            | 4.753                                                                         | 4.535                                                                                         | 4.508                                                                                            |
| F(000)                             | 488.0                                                            | 904.0                                                                         | 410.0                                                                                         | 5472.0                                                                                           |
| Crystal size/mm <sup>3</sup>       | 0.24 × 0.08 × 0.06                                               | 0.14 × 0.08 × 0.04                                                            | 0.12 × 0.08 × 0.04                                                                            | 0.08×0.06×0.04                                                                                   |
| Radiation                          | Mo Kα (λ = 0.71073)                                              | Mo Kα (λ = 0.71073)                                                           | Mo Kα (λ = 0.71073)                                                                           | Mo Kα (λ = 0.71073)                                                                              |
| 2θ range for data collection/°     | 7.06 to 54.146                                                   | 6.64 to 50.102                                                                | 6.35 to 54.766                                                                                | 6.22 to 56.942                                                                                   |
| Index ranges                       | -5 ≤ h ≤ 5,<br>-14 ≤ k ≤ 14,<br>-22 ≤ l ≤ 23                     | -10 ≤ h ≤ 9,<br>-7 ≤ k ≤ 7,<br>-39 ≤ l ≤ 39                                   | -10 ≤ h ≤ 10,<br>-12 ≤ k ≤ 12,<br>-13 ≤ l ≤ 11                                                | -22 ≤ h ≤ 24,<br>-25 ≤ k ≤ 25,<br>-37 ≤ l ≤ 36                                                   |
| Reflections collected              | 13911                                                            | 13973                                                                         | 8754                                                                                          | 110264                                                                                           |
| Independent reflections            | 2011 [R <sub>int</sub> = 0.0455,<br>R <sub>sigma</sub> = 0.0318] | 3007 [R <sub>int</sub> = 0.0624 ,<br>R <sub>sigma</sub> = 0.0670]             | 3037 [R <sub>int</sub> = 0.0323<br>, R <sub>sigma</sub> = 0.0447]                             | 23251 [R <sub>int</sub> =<br>0.3771 , R <sub>sigma</sub> =                                       |

|                                                |                                                      |                                                      |                                                      |                                                      |
|------------------------------------------------|------------------------------------------------------|------------------------------------------------------|------------------------------------------------------|------------------------------------------------------|
|                                                |                                                      |                                                      |                                                      | 0.3948]                                              |
| Data/restraints/<br>parameter                  | 2011/0/120                                           | 3007/1/219                                           | 3037/0/167                                           | 23251/0/1098                                         |
| Goodness-of-fit on F <sup>2</sup>              | 1.068                                                | 1.015                                                | 1.055                                                | 0.901                                                |
| Final R indexes<br>[I>2σ(I)]                   | R <sub>1</sub> = 0.0425,<br>wR <sub>2</sub> = 0.0918 | R <sub>1</sub> = 0.0507,<br>wR <sub>2</sub> = 0.1017 | R <sub>1</sub> = 0.0334,<br>wR <sub>2</sub> = 0.0822 | R <sub>1</sub> = 0.1000,<br>wR <sub>2</sub> = 0.2234 |
| Final R indexes [all<br>data]                  | R <sub>1</sub> = 0.0628, wR <sub>2</sub> =<br>0.0982 | R <sub>1</sub> = 0.0873, wR <sub>2</sub> =<br>0.1134 | R <sub>1</sub> = 0.0413, wR <sub>2</sub> =<br>0.0851 | R <sub>1</sub> = 0.2813,<br>wR <sub>2</sub> = 0.3092 |
| Largest diff.<br>peak/hole / e Å <sup>-3</sup> | 0.65/-0.39                                           | 0.28/-0.28                                           | 0.81/-0.74                                           | 1.38/-1.85                                           |

**Table S2** Bonding parameters for for Ligands BSAL-EA and BSAL-DAP, Complexes 1 and 2.

| <b>Bond angles (°)</b> |           |                 |            |                        |             |                  |            |
|------------------------|-----------|-----------------|------------|------------------------|-------------|------------------|------------|
| <b>BSAL-EA</b>         |           | <b>BSAL-DAP</b> |            | <b>Complex 1</b>       |             | <b>Complex 2</b> |            |
| C7-N1-C8               | 122.5 (3) | C3-N2-C2        | 119.7 (10) | O1-Sn1-O2 <sup>1</sup> | 139.41 (9)  | O1-Sn1-O4        | 144.1 (4)  |
| N1-C7-C5               | 123.1 (3) | C11-N1-C10      | 122.3 (10) | O2-Sn1-O1              | 150.64 (10) | O2-Sn1-O5        | 137.7 (4)  |
| C6-C1-Br1              | 120.6 (3) | N2-C3-C4        | 122.3 (11) | O2-Sn1-O2 <sup>1</sup> | 69.60 (11)  | O5-Sn1-O4        | 70.4 (4)   |
| O1-C4-C5               | 120.9 (3) | C7-C8-Br2       | 120.5 (9)  | O2-Sn1-N1              | 75.05 (10)  | O2-Sn1-N1        | 70.3 (4)   |
| O1-C4-C3               | 120.3 (3) | N2-C2-C1        | 111.6 (9)  | N1-Sn1-O1              | 76.48 (10)  | O2-Sn2-O3        | 151.9 (4)  |
| N1-C8-C9               | 111.6 (3) | O2-C1-C2        | 111.7 (9)  | C10-Sn1-N1             | 109.31 (15) | O2-Sn2-N2        | 73.8 (6)   |
| O2-C9-C8               | 107.8 (3) | N10-C10-C1      | 110.9 (9)  | C11-Sn1-N1             | 97.53 (15)  | N2-Sn2-O4        | 143.9 (5)  |
| <b>Bond length (Å)</b> |           |                 |            |                        |             |                  |            |
| <b>BSAL-EA</b>         |           | <b>BSAL-DAP</b> |            | <b>Complex 1</b>       |             | <b>Complex 2</b> |            |
| Br1-C1                 | 1.901(3)  | Br1-C16         | 1.900 (11) | Sn1-O1                 | 2.273 (3)   | Sn1-O1           | 2.162 (12) |
| O1-C4                  | 1.283(4)  | Br2-C8          | 1.884 (11) | Sn1-O2                 | 2.094 (2)   | Sn1-O2           | 2.252 (12) |
| O2-C9                  | 1.406(4)  | O2-C1           | 1.399(12)  | Sn1-N1                 | 2.244 (3)   | Sn1-N1           | 2.262 (12) |
| N1-C7                  | 1.292(4)  | O1-C13          | 1.280 (12) | Sn1-C10                | 2.101 (4)   | Sn2-N2           | 2.243 (16) |
| N1-C8                  | 1.458(4)  | O3-C5           | 1.339 (13) | Sn1-C11                | 2.113 (4)   | Sn2-O4           | 2.436 (11) |
| C7-C5                  | 1.419(4)  | N2-C3           | 1.272 (13) | Sn1-O2 <sup>1</sup>    | 2.399 (2)   | Sn2-O2           | 2.156 (12) |

**Table S3** charge distribution and Fukui index of AMX

| Atom<br>(number) | Charge (0)<br>( $e/A$ ) | Charge (+1)<br>( $e/A$ ) | Charge (-1)<br>( $e/A$ ) | $f^+$  | $f^-$  | $f^0$         |
|------------------|-------------------------|--------------------------|--------------------------|--------|--------|---------------|
| C (1)            | -0.220                  | -0.215                   | -0.222                   | 0.005  | 0.002  | 0.0035        |
| C (2)            | -0.101                  | 0.006                    | -0.100                   | 0.107  | -0.001 | 0.053         |
| C (3)            | -0.217                  | -0.194                   | -0.257                   | 0.023  | 0.04   | 0.0315        |
| C (4)            | -0.306                  | -0.272                   | -0.319                   | 0.034  | 0.013  | 0.0235        |
| C (5)            | 0.313                   | 0.380                    | 0.292                    | 0.067  | 0.021  | 0.044         |
| C (6)            | -0.282                  | -0.223                   | -0.222                   | 0.059  | -0.06  | -0.0005       |
| O (11)           | -0.712                  | -0.622                   | -0.726                   | 0.09   | 0.014  | 0.052         |
| C (13)           | -0.174                  | -0.190                   | -0.196                   | -0.016 | 0.022  | 0.003         |
| C (18)           | 0.686                   | 0.678                    | 0.674                    | -0.008 | 0.012  | 0.002         |
| O (19)           | -0.623                  | -0.529                   | -0.659                   | 0.094  | 0.036  | <b>0.065</b>  |
| N (15)           | -0.909                  | -0.851                   | -0.959                   | 0.058  | 0.05   | <b>0.054</b>  |
| N (20)           | -0.677                  | -0.653                   | -0.674                   | 0.024  | -0.003 | 0.0105        |
| C (22)           | -0.166                  | -0.160                   | -0.178                   | 0.006  | 0.012  | 0.009         |
| C (23)           | -0.194                  | -0.207                   | -0.221                   | -0.013 | 0.027  | 0.007         |
| O (28)           | -0.566                  | -0.521                   | -0.626                   | 0.045  | 0.06   | <b>0.0525</b> |
| C (27)           | 0.711                   | 0.707                    | 0.665                    | -0.004 | 0.046  | 0.021         |
| N (26)           | -0.504                  | -0.0482                  | -0.0520                  | 0.022  | 0.016  | 0.019         |
| C (29)           | -0.162                  | -0.166                   | -0.164                   | -0.004 | 0.002  | -0.001        |
| C (40)           | 0.826                   | 0.818                    | 0.752                    | -0.008 | -0.074 | 0.033         |
| O (41)           | -0.596                  | -0.568                   | -0.674                   | 0.028  | 0.078  | <b>0.053</b>  |
| O (42)           | -0.722                  | -0.726                   | -0.744                   | -0.004 | 0.022  | 0.009         |
| C (31)           | -0.176                  | -0.169                   | -0.211                   | 0.007  | 0.035  | 0.021         |
| C (32)           | -0.708                  | -0.716                   | -0.700                   | -0.008 | -0.008 | -0.008        |
| C (36)           | -0.699                  | -0.702                   | -0.696                   | -0.003 | -0.003 | <b>-0.003</b> |
| S (44)           | 0.170                   | 0.287                    | 0.053                    | 0.117  | 0.117  | 0.117         |
